# Supplementary material
Source: PubMed Central journal article supplement (PMC6206883)
Supplement: NIHMS1502564-supplement-Supplemental_Material.pdf [file NIHMS1502564-supplement-Supplemental_Material.pdf]

SUPPLEMENTAL MATERIAL

Supplemental Figures

Figure S1. PDE5 is Expressed in Pediatric RV Cardiomyocytes

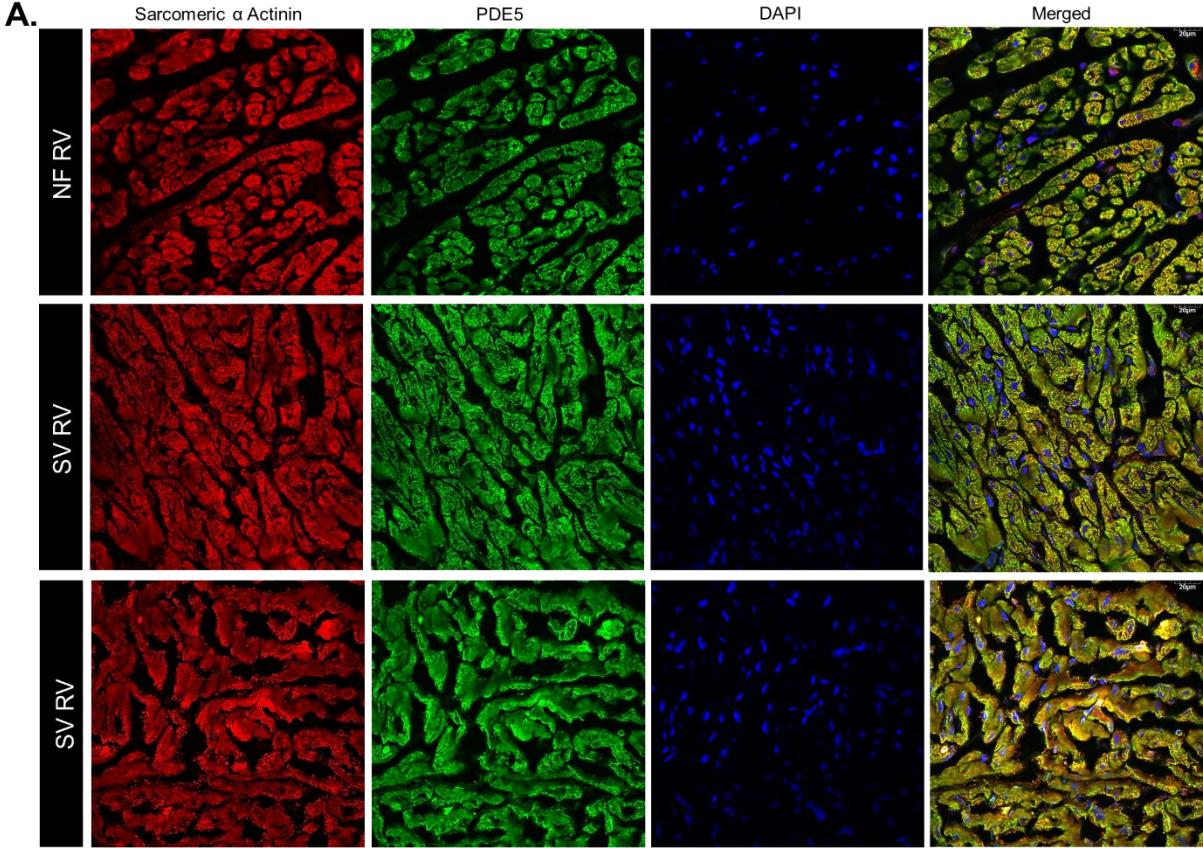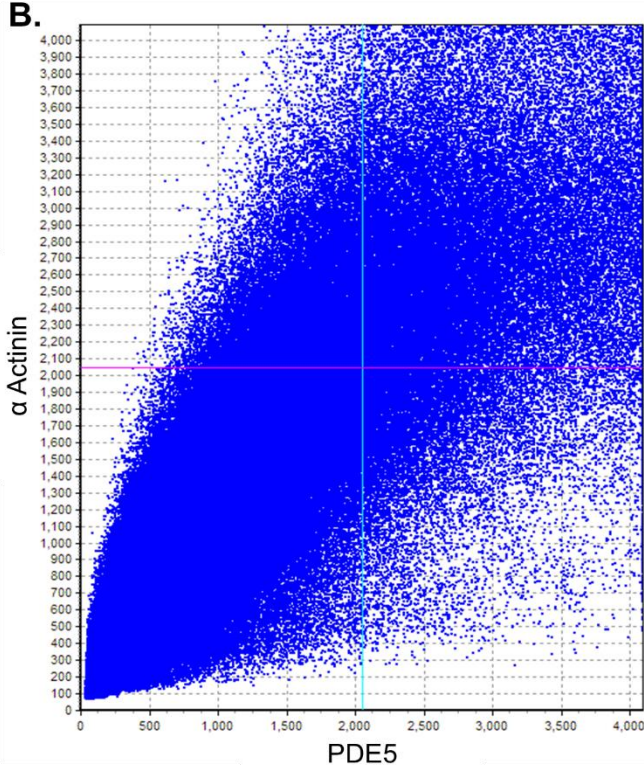

**Figure S2. Top Canonical Pathways Activated by SV Serum Treatment *in vitro***

| Top Canonical Pathways        |                                |                                            |
|-------------------------------|--------------------------------|--------------------------------------------|
| Name                          | NF vs SV<br>Activation z-score | NF+PDE5i vs SV+PDE5i<br>Activation z-score |
| Ceramide Signaling            | 1.7                            | 1.4                                        |
| p38 MAPK Signaling            | 1.6                            | 0.82                                       |
| Phospholipase C Signaling     | 2.5                            | 0.38                                       |
| Cardiac Hypertrophy Signaling | 0.5                            | -1                                         |
| Actin Cytoskeleton Signaling  | 1.8                            | -0.33                                      |

## Supplemental Tables

### Table S1. Subject Characteristics

| ID                                   | Age at Tissue Collection (yrs) | Sex | PDE3i | PDE5i | Non-PDEi Inotrope | Digoxin | ACEi | $\beta$ -Blocker | Diuretic | Last Surgical Palliation                         | Indication for Transplant | RV PDE5 Activity | RV PDE5 Protein | RV PDE5 IHC | NRVM Serum Treatment RT-PCR | NRVM Serum Treatment RNAseq | RV RT-PCR |
|--------------------------------------|--------------------------------|-----|-------|-------|-------------------|---------|------|------------------|----------|--------------------------------------------------|---------------------------|------------------|-----------------|-------------|-----------------------------|-----------------------------|-----------|
| <b>Single Right Ventricle (n=18)</b> |                                |     |       |       |                   |         |      |                  |          |                                                  |                           |                  |                 |             |                             |                             |           |
| 1                                    | 3.85                           | F   | Y     | Y     | N                 | Y       | N    | N                | Y        | Glenn                                            | Systolic HF               | X                |                 |             | X                           | X (pooled)                  | X         |
| 2                                    | 3.81                           | M   | Y     | N     | N                 | NA      | NA   | N                | NA       | Fontan                                           | Systolic HF               | X                | X               |             |                             |                             | X         |
| 3                                    | 0.87                           | F   | Y     | N     | N                 | Y       | Y    | N                | N        | Norwood                                          | Systolic HF               | X                |                 |             | X                           | X                           | X         |
| 4                                    | 0.83                           | F   | Y     | N     | N                 | N       | N    | N                | Y        | Norwood                                          | Systolic HF               |                  |                 |             | X                           | X (pooled)                  | X         |
| 5                                    | 4.96                           | M   | Y     | N     | Y                 | Y       | Y    | N                | Y        | Fontan                                           | Systolic HF               | X                |                 |             |                             |                             |           |
| 6                                    | 2.84                           | F   | Y     | N     | N                 | Y       | Y    | N                | Y        | Glenn                                            | Systolic HF               | X                | X               |             |                             |                             | X         |
| 7                                    | 10.06                          | M   | Y     | Y     | N                 | N       | Y    | N                | Y        | Fontan                                           | Systolic HF, PLE          | X                |                 |             | X                           |                             | X         |
| 8                                    | 0.44                           | M   | Y     | N     | N                 | N       | Y    | N                | Y        | Norwood                                          | Systolic HF               | X                | X               |             |                             |                             | X         |
| 9                                    | 2.27                           | M   | Y     | N     | N                 | Y       | Y    | N                | Y        | Glenn                                            | Systolic HF               | X                | X               |             |                             |                             | X         |
| 10                                   | 0.99                           | F   | N     | N     | N                 | Y       | Y    | N                | Y        | Norwood                                          | Systolic HF               | X                | X               |             | X                           |                             | X         |
| 11                                   | 1.27                           | M   | N     | N     | N                 | N       | Y    | N                | Y        | Hybrid Stage 1 (PA banding)                      | Systolic HF               |                  | X               |             |                             |                             | X         |
| 12                                   | 2.92                           | M   | Y     | Y     | N                 | Y       | Y    | N                | Y        | Glenn                                            | Systolic HF               |                  | X               | X           | X                           | X                           | X         |
| 13                                   | 12.26                          | M   | N     | N     | N                 | Y       | Y    | N                | N        | Glenn                                            | Systolic HF               |                  |                 | X           | X                           |                             | X         |
| 14                                   | 0.23                           | M   | Y     | N     | N                 | Y       | N    | N                | Y        | Norwood                                          | Systolic HF               |                  |                 | X           | X                           |                             | X         |
| 15                                   | 4.75                           | M   | N     | N     | N                 | N       | N    | N                | N        | Glenn                                            | Systolic HF, PLE          |                  |                 |             | X                           |                             |           |
| 16                                   | 0.73                           | F   | N     | N     | N                 | Y       | N    | N                | Y        | Hybrid Stage 1 (PDA stent, bilateral PA banding) | Systolic HF               |                  |                 |             | X                           |                             | X         |
| 17                                   | 0.92                           | M   | N     | N     | N                 | N       | N    | N                | Y        | Norwood                                          | Systolic HF               |                  |                 |             | X                           |                             |           |
| 18                                   | 5.08                           | M   | N     | Y     | N                 | Y       | Y    | N                | Y        | Glenn                                            | Systolic HF               |                  |                 |             | X                           |                             |           |
| <b>Non-Failing (n=17)</b>            |                                |     |       |       |                   |         |      |                  |          |                                                  |                           |                  |                 |             |                             |                             |           |
| 1                                    | 13.58                          | F   | N     | N     | N                 | N       | N    | N                | N        | --                                               | --                        |                  |                 |             | X                           | X                           |           |
| 2                                    | 11.48                          | M   | N     | N     | N                 | N       | N    | N                | N        | --                                               | --                        |                  |                 |             | X                           | X                           |           |
| 3                                    | 15.45                          | F   | N     | N     | N                 | N       | N    | N                | N        | --                                               | --                        |                  |                 |             | X                           | X                           |           |
| 4                                    | 0.42                           | F   | N     | N     | N                 | Y       | N    | N                | N        | --                                               | --                        |                  |                 |             | X                           |                             |           |
| 5                                    | 7                              | M   | N     | N     | N                 | N       | N    | N                | N        | --                                               | --                        |                  |                 |             | X                           |                             |           |
| 6                                    | 14                             | M   | N     | N     | N                 | N       | N    | N                | N        | --                                               | --                        | X                |                 |             |                             |                             |           |
| 7                                    | 1.3                            | F   | N     | N     | Y                 | N       | N    | N                | N        | --                                               | --                        | X                | X               |             |                             |                             | X         |
| 8                                    | 3.24                           | F   | N     | N     | Y                 | N       | N    | N                | N        | --                                               | --                        | X                | X               |             |                             |                             | X         |
| 9                                    | 9.51                           | M   | N     | N     | Y                 | N       | N    | Y                | N        | --                                               | --                        | X                |                 |             |                             |                             | X         |
| 10                                   | 7.4                            | M   | N     | N     | Y                 | N       | N    | N                | N        | --                                               | --                        | X                | X               |             |                             |                             | X         |
| 11                                   | 1.4                            | M   | N     | N     | N                 | N       | N    | N                | N        | --                                               | --                        | X                | X               |             |                             |                             | X         |
| 12                                   | 7                              | M   | N     | N     | N                 | N       | N    | N                | N        | --                                               | --                        |                  | X               |             |                             |                             | X         |
| 13                                   | 8                              | F   | N     | N     | N                 | N       | N    | N                | N        | --                                               | --                        | X                | X               |             |                             |                             | X         |
| 14                                   | 17                             | M   | N     | N     | N                 | N       | N    | N                | N        | --                                               | --                        |                  | X               |             |                             |                             |           |
| 15                                   | 13.65                          | M   | N     | N     | N                 | N       | N    | N                | N        | --                                               | --                        |                  | X               |             |                             |                             |           |
| 16                                   | 8.69                           | M   | N     | N     | N                 | N       | N    | N                | N        | --                                               | --                        |                  | X               |             |                             |                             |           |
| 17                                   | 2.87                           | M   | N     | N     | Y                 | N       | N    | N                | N        | --                                               | --                        |                  |                 | X           |                             |                             |           |

**Table S2. RT-qPCR Primer Sequences**

| Target                                 | Sequence                                                               |
|----------------------------------------|------------------------------------------------------------------------|
| r/h 18S F<br>r/h 18S R                 | GCC GCT AGA GGT GAA ATT CTT G<br>CTT TCG CTC TGG TCC GTC TT            |
| r BNP F<br>r BNP R                     | GGT GCT GCC CCA GAT GAT T<br>CTG GAG ACT GGC TAG GAC TTC               |
| r ANF F<br>r ANF R                     | GCG AAG GTC AAG CTG CTT<br>CTG GGC TCC AAT CCT GTC AAT                 |
| r $\beta$ -MHC F<br>r $\beta$ -MHC R   | CGC TCA GTC ATG GCG GAT<br>GCC CCA AAT GCA GCC AT                      |
| r $\alpha$ -MHC F<br>r $\alpha$ -MHC R | CCT GTC CAG CAG AAA GAG C<br>CAG GCA AAG TCA AGC ATT CAT ATT TAT TGT G |
| h CERK F<br>h CERK R                   | GCGGATGCCTGCTCTGTG<br>ACT GCC TTG ATG TTT CCC GT                       |
| h CREB5 F<br>h CREB5 r                 | AGA GAG CAA GTG AGC GAG AG<br>CCA GGC CAA GCG ATG ATG TA               |
| h FYN F<br>h FYN R                     | GTA GTC ATG GCA ACC CGC TA<br>ACA ACC CCC ACC CTC ATT TC               |
| h ANKRD1 F<br>h ANKRD1 R               | GCC AAA GAC AGA GAA GGA GAT AC<br>GAG ATC CGC GCC ATA CAT AAT          |
| h ACTN2 F<br>h ACTN2 R                 | GGA GAA CCG GAC TCC CGA GAA<br>CTC CAG CTT CTT CTG CAT GGC TT          |
| h MAFK F<br>h MAFK R                   | CTG GGA TGC AGA CTC TCG AC<br>CCC ACT CTT CAC CCT GCA AT               |

**Table S3. Differentially Expressed Transcripts**

| Gene                      | Mean SV Fold vs NF |
|---------------------------|--------------------|
| <b>NF vs SV p&lt;0.05</b> |                    |
| 5S_RRNA                   | -1.646180342       |
| 6720489N17RIK             | -0.655669082       |
| A930018M24RIK             | -2.217353613       |
| AABR06000382.1            | 1.001453421        |
| AABR06007342.1            | 1.024314418        |
| AABR06010214.2            | 1.650833181        |
| AABR06010472.1            | 0.523964523        |
| AABR06011545.1            | -1.912229994       |
| AABR06023589.1            | 0.58087928         |
| AABR06024097.1            | 0.658273107        |
| AABR06024251.1            | 0.413693705        |
| AABR06026863.1            | 0.464373705        |
| AABR06027280.1            | 1.050008555        |
| AABR06029472.1            | 1.587547191        |
| AABR06033179.1            | 0.673896244        |
| AABR06036827.1            | 0.914353521        |
| AABR06037778.1            | 2.045651522        |
| AABR06038971.1            | 1.392086118        |
| AABR06040258.1            | -0.991919217       |
| AABR06040815.1            | -2.138605286       |
| AABR06041819.1            | -1.63444874        |
| AABR06044860.1            | -1.941822365       |
| AABR06045205.1            | -0.634564267       |
| AABR06046241.1            | 1.712642835        |
| AABR06048498.1            | 1.186323031        |
| AABR06048982.1            | 1.972023405        |
| AABR06053456.1            | -1.202504971       |
| AABR06053812.1            | 0.557585172        |
| AABR06057556.1            | 0.323986256        |
| AABR06058265.2            | 0.389768665        |
| AABR06058815.1            | 1.050008555        |
| AABR06060087.2            | -0.873848025       |
| AABR06060231.1            | 0.864326125        |
| AABR06061565.1            | 1.215329037        |
| AABR06064750.1            | 1.591720725        |
| AABR06064824.1            | 0.974062854        |
| AABR06065588.2            | 0.569561596        |
| AABR06065806.1            | -0.654542605       |

|                |              |
|----------------|--------------|
| AABR06066473.1 | 0.897136763  |
| AABR06069280.1 | 1.058057794  |
| AABR06070504.1 | -0.601679977 |
| AABR06078259.1 | 2.345180871  |
| AABR06080116.1 | 0.487362668  |
| AABR06082055.1 | -1.072294105 |
| AABR06082339.1 | -0.773580795 |
| AABR06083207.1 | 1.64863059   |
| AABR06085043.1 | 0.281667994  |
| AABR06086840.1 | 0.569278487  |
| AABR06087659.1 | 0.516177111  |
| AABR06091093.1 | 0.53696711   |
| AABR06098247.1 | 0.421485963  |
| AABR06098740.1 | 0.302591378  |
| AABR06100487.1 | 0.591194544  |
| AABR06100487.2 | 0.644269592  |
| AABR06100965.1 | 0.914576446  |
| AABR06101044.1 | 1.591544099  |
| AABR06107093.1 | 0.232294946  |
| ABCB9          | 1.178008288  |
| ABCC8          | -0.893969086 |
| ABHD8          | -0.640625552 |
| ABI3BP         | 0.792680895  |
| ABLIM2         | -1.471768608 |
| ACE3           | 1.187308649  |
| ACKR2          | 2.729050206  |
| ACSL4          | 0.901234329  |
| ACSS2          | 0.862136359  |
| ACTC1          | 0.976344019  |
| ACTN2          | 0.473984096  |
| ACTR1A         | 0.356218257  |
| ADAL           | -0.857306886 |
| ADAM10         | -0.711785474 |
| ADAM11         | -0.818450795 |
| ADAM15         | 0.843256277  |
| ADAMTS19       | 1.993868118  |
| ADAMTS3        | -1.1835838   |
| ADAMTS7        | -0.627998946 |
| ADAMTS8        | -0.241177845 |
| ADAMTSL3       | -1.314154432 |
| ADAMTSL5       | 0.507752592  |
| ADAR           | -0.399737376 |
| ADCK3          | -0.921416405 |

|          |              |
|----------|--------------|
| ADCY4    | 0.693384254  |
| ADCY5    | -0.429999298 |
| ADCY8    | -1.956614667 |
| ADH1     | 2.525669885  |
| ADI1     | -0.37742382  |
| ADM2     | 2.015688008  |
| ADRA1D   | -0.579228857 |
| ADSSL1   | -0.79703688  |
| AGBL5    | -0.568035088 |
| AGFG1    | 0.464358617  |
| AGK      | 0.4968621    |
| AGPAT2   | 0.621798062  |
| AK4      | 1.603186509  |
| AKIP1    | 1.553030816  |
| ALAS1    | 0.607059175  |
| ALDH2    | 0.618122182  |
| ALDH3A2  | 0.505519938  |
| ALG3     | 0.351616428  |
| ALOX12   | -1.392308656 |
| ALS2     | -0.399081953 |
| AMER1    | -1.233632942 |
| AMIGO1   | -0.494631255 |
| AMPD3    | -0.731816225 |
| ANGPTL2  | 0.862887553  |
| ANKMY2   | -0.366413575 |
| ANKRD1   | 1.000858681  |
| ANKRD10  | -0.604316756 |
| ANXA2    | 0.473586919  |
| ANXA5    | 0.818955004  |
| APOH     | -1.511927729 |
| APOLD1   | 0.868765479  |
| ARAP3    | 1.218460535  |
| ARHGAP27 | 0.842137506  |
| ARHGAP29 | -0.499353888 |
| ARHGAP39 | -0.572715807 |
| ARHGEF10 | -0.386789816 |
| ARHGEF17 | -0.580804818 |
| ARHGEF5  | -0.511437877 |
| ARHGEF6  | 0.647089047  |
| ARL16    | 0.449278229  |
| ARL3     | 0.359324982  |
| ARL4A    | 0.721526501  |
| ARMC7    | -0.557236111 |

|          |              |
|----------|--------------|
| ARNTL    | 0.571319797  |
| ARRDC3   | -1.270772383 |
| ARVCF    | -0.931398398 |
| ASB14    | -2.184012537 |
| ASIC1    | 1.487656662  |
| ASPM     | -0.556329023 |
| ATF3     | 2.074117271  |
| ATF4     | 0.752754774  |
| ATG14    | -0.358460863 |
| ATP11A   | -0.492866863 |
| ATP4A    | 1.403276052  |
| ATP6AP1L | -1.198703469 |
| ATP6V0E1 | 0.559518166  |
| ATP8A1   | 1.134513847  |
| ATXN10   | 0.548552037  |
| ATXN7    | -0.844295955 |
| AVPI1    | 0.937307024  |
| AXIN2    | -0.698391243 |
| AXL      | 0.518357854  |
| B3GAT1   | -2.567315433 |
| B3GNT2   | 0.543064798  |
| B3GNT5   | 1.83761358   |
| B4GALNT2 | -1.253235627 |
| B4GALT1  | 0.569204579  |
| BAHCC1   | -0.74666213  |
| BAK1     | 0.403997893  |
| BC024978 | -0.672785971 |
| BCAT1    | 0.796309556  |
| BCHE     | -1.063980079 |
| BCL11B   | -1.142491371 |
| BCL7A    | -0.498557339 |
| BCL9     | -0.437607897 |
| BDH1     | 1.020674305  |
| BEAN1    | 1.870429754  |
| BHLHE40  | 0.63220649   |
| BHLHE41  | -0.892122441 |
| BIN2A    | 1.834335747  |
| BMP2     | 1.00488817   |
| BMP5     | -1.367015495 |
| BMP6     | 0.726489712  |
| BNIP3    | 0.858950915  |
| BOC      | -0.651613607 |
| BOD1     | -0.545457139 |



|           |              |
|-----------|--------------|
| BOK       | 0.891366501  |
| BPIFA1    | 2.691508718  |
| BRCA2     | -0.569140911 |
| BRD3      | -0.484219438 |
| BRINP2    | -0.371621574 |
| BTBD8     | -0.953656804 |
| BTG2      | 1.009718514  |
| C1QTNF9   | -1.187169215 |
| C2CD4B    | 2.93241104   |
| C2CD5     | -0.82138836  |
| C3AR1     | 1.418762964  |
| CABLES1   | 0.930626676  |
| CACNA1H   | 0.498424511  |
| CAD       | -0.388716222 |
| CAMK1D    | -0.960728214 |
| CAMK2A    | -0.600729884 |
| CAMTA1    | 1.128395021  |
| CAP1      | 0.376498046  |
| CAPG      | 1.091327704  |
| CAPN12    | -1.436916241 |
| CAR12     | 1.501524156  |
| CAR4      | 2.847949081  |
| CAR5B     | 1.25980516   |
| CAR6      | -0.439933583 |
| CARD11    | -0.848865617 |
| CARNS1    | -0.374214689 |
| CARS2     | -0.720018409 |
| CASKIN1   | -0.656284725 |
| CASP7     | -0.431343539 |
| CASQ1     | 1.202216494  |
| CATSPERG1 | 1.572822315  |
| CBX2      | -0.563298371 |
| CC2D2A    | -0.749337121 |
| CCDC57    | -0.603020492 |
| CCDC68    | 0.941074138  |
| CCDC69    | -0.61884185  |
| CCDC88C   | -0.429617676 |
| CCL20     | 1.595076825  |
| CCL27     | 0.820903518  |
| CCL3      | 1.80940481   |
| CCL6      | 1.863063049  |
| CCRL2     | 0.489995057  |
| CCRN4L    | 1.258905519  |

|         |              |
|---------|--------------|
| CD14    | 1.012707794  |
| CD163   | 2.483288826  |
| CD209F  | 2.040668627  |
| CD48    | 0.637964098  |
| CD55    | 0.755469978  |
| CD68    | 1.533628321  |
| CDC25B  | 0.936615134  |
| CECR5   | 0.458703377  |
| CELSR1  | -1.307257297 |
| CELSR2  | -0.644726883 |
| CEP135  | -0.552157662 |
| CEP19   | 0.57443761   |
| CEP41   | -0.782752902 |
| CEP70   | -1.643398493 |
| CEP78   | -0.803495564 |
| CERK    | 0.596368014  |
| CERS5   | 0.395516777  |
| CH25H   | 1.682644147  |
| CHAC1   | 1.686483917  |
| CHM     | -0.347182963 |
| CHRDL1  | -1.021006539 |
| CIART   | 1.242011466  |
| CIRBP   | -0.741622212 |
| CISH    | 0.976447623  |
| CKAP2L  | -0.906547413 |
| CLEC10A | 2.504647627  |
| CLEC2G  | 0.680231927  |
| CLEC4E  | 2.329626079  |
| CLIC5   | 1.272703198  |
| CLN8    | 0.583371383  |
| CMBL    | -1.177577068 |
| CMC2    | 0.441165143  |
| CNIH4   | 0.372592599  |
| CNKSR1  | 1.134149722  |
| CNN3    | 0.791348191  |
| CNST    | -0.624057144 |
| COG1    | -0.373380429 |
| COG5    | -0.576986489 |
| COL16A1 | 0.833148335  |
| COL20A1 | -0.621363276 |
| COL4A1  | 0.897328345  |
| COL7A1  | 2.03553376   |
| COL8A1  | 0.552814626  |

|          |              |
|----------|--------------|
| COMMD7   | -0.373449274 |
| COX4I2   | 2.306721179  |
| COX6A2   | 0.399834778  |
| CP       | 1.461604819  |
| CPA5     | 1.521265842  |
| CPA6     | 1.959263673  |
| CREB5    | 1.681945318  |
| CRELD2   | -0.865151283 |
| CRISPLD2 | 1.458901688  |
| CRLF1    | 3.222833299  |
| CRYAB    | 0.75849718   |
| CSDC2    | 1.561457456  |
| CSF2RB   | 1.518450326  |
| CSPG5    | -1.110564292 |
| CSRNP1   | 1.063936311  |
| CSRP2    | 1.428900682  |
| CSRP3    | 1.60105627   |
| CTC1     | -0.34194113  |
| CTCF     | -0.450757353 |
| CTSS     | 2.501153207  |
| CUL9     | -0.442527427 |
| CUX1     | 0.431857642  |
| CUZD1    | -1.510307757 |
| CXXC4    | -0.862522174 |
| CXXC5    | -0.394359254 |
| CYBA     | 0.711377588  |
| CYCS     | 0.387686479  |
| CYP2D1   | 2.317435833  |
| CYP3A18  | -1.675609153 |
| CYP4F17  | -0.606518243 |
| CYP4F6   | -0.483476409 |
| CYP51    | 1.125192064  |
| DAAM2    | 1.212135674  |
| DACT2    | 1.618053491  |
| DAPP1    | -0.545335948 |
| DCAF4    | -0.90309107  |
| DCK      | -0.530320166 |
| DCLK1    | 0.854032065  |
| DDIT4L2  | -1.05613764  |
| DDN      | -1.78268379  |
| DDT      | 0.510650151  |
| DDX51    | -0.545208802 |
| DERL3    | -1.843116568 |

|          |              |
|----------|--------------|
| DES      | 0.668723637  |
| DESI1    | 0.436312798  |
| DFFA     | 0.783492633  |
| DHX37    | -0.505303841 |
| DIABLO   | 0.466802379  |
| DIAPH1   | 0.499813113  |
| DISP1    | -0.581284839 |
| DLK1     | 3.406254678  |
| DMTN     | -1.822787198 |
| DNAH11   | -1.495010964 |
| DNAH17   | 0.682500843  |
| DNAJB5   | 0.965922357  |
| DNAJC15  | 0.384304513  |
| DOCK7    | -0.726597992 |
| DOPEY1   | -0.451034368 |
| DOT1L    | 0.549078275  |
| DPEP1    | 1.925691948  |
| DRAXIN   | 2.2719842    |
| DSE      | 0.641411019  |
| DSTYK    | -0.442941508 |
| DTNA     | 0.587999645  |
| DTWD1    | -0.625871858 |
| DUPD1    | 2.282007692  |
| DUSP1    | 1.530446693  |
| DUSP2    | 2.139316522  |
| DUSP8    | 1.73360109   |
| DYRK1B   | -0.365057875 |
| EBF1     | 0.960743094  |
| EBP      | 0.790425006  |
| ECHDC1   | 0.58774444   |
| ECSCR    | -1.115789665 |
| EDA      | -1.406385571 |
| EDAR     | 1.793519803  |
| EFCAB3   | 1.393841703  |
| EFCAB6   | 1.970949463  |
| EFHD1    | -1.868263305 |
| EFHD2    | 0.880960557  |
| EFNB1    | -0.45929298  |
| EFNB3    | -0.544563874 |
| EGLN3    | 1.670807833  |
| EHBP1L1  | 0.576776669  |
| EIF4EBP1 | 0.742708748  |
| ELL2     | 0.461369487  |

|         |              |
|---------|--------------|
| ELOF1   | 0.345665726  |
| ELOVL2  | -1.585085542 |
| EMC9    | -0.929668033 |
| EMP3    | 0.576471398  |
| ENAH    | 0.915218242  |
| ENKUR   | 1.477806956  |
| ENO1    | 0.652400547  |
| ENPP3   | 1.867682641  |
| EPHA3   | -1.823959992 |
| EPHX2   | -0.508365619 |
| EPPIN   | 0.727561998  |
| EPS8    | 0.717475655  |
| ERBB2   | -0.617581977 |
| ERMAP   | 2.191968584  |
| ERO1L   | 0.873162703  |
| ERRFI1  | 1.868350556  |
| ESPNL   | -0.884677397 |
| ESRRB   | 1.184264221  |
| ETL4    | -0.814978224 |
| EZH2    | -0.502723117 |
| F13A1   | 3.481630739  |
| F3      | 0.800444756  |
| FABP5   | 0.827882852  |
| FADS3   | 0.82464374   |
| FAM163A | -0.59051331  |
| FAM167B | 2.195118245  |
| FAM168B | -0.485739252 |
| FAM174B | -1.609417878 |
| FAM175A | -0.474324141 |
| FAM180A | 1.980742222  |
| FAM212B | 0.540556946  |
| FAM213A | 1.413952667  |
| FAM220A | -0.478750433 |
| FAM46B  | 1.708124823  |
| FAM78A  | -0.670824545 |
| FAM96A  | 0.481064058  |
| FAXC    | 0.77634182   |
| FBP2    | -1.189706605 |
| FBXL4   | -0.396770857 |
| FBXO21  | -0.55985468  |
| FCGBP   | 1.553074346  |
| FCGR2A  | 2.296598166  |
| FEN1    | -0.350174952 |

|           |              |
|-----------|--------------|
| FERMT3    | 1.523953867  |
| FGD1      | -1.076894887 |
| FGF12     | -0.924000416 |
| FGG       | -2.200948693 |
| FGR       | 0.802932248  |
| FHAD1     | 3.979124805  |
| FHL1      | 1.497672313  |
| FIGN      | -1.015443529 |
| FKBP10    | 0.555127838  |
| FKBP1A    | 0.483427832  |
| FKBP4     | -0.578807197 |
| FLRT3     | -0.469312449 |
| FLT1      | 1.553257762  |
| FLT4      | 1.259633846  |
| FNDC7     | -1.821896529 |
| FOSB      | 2.483675391  |
| FOXO6     | -0.607552528 |
| FOXP2     | -1.119218096 |
| FRAS1     | -1.26281888  |
| FREM2     | -1.499536133 |
| FRRS1     | 0.786388371  |
| FRS3      | -0.638518496 |
| FRZB      | 1.239555012  |
| FSTL3     | 1.632902401  |
| FXYD1     | 0.492222905  |
| FXYD2     | 1.914514286  |
| FYN       | 0.775763479  |
| FZD1      | -0.534849679 |
| GABARAPL1 | 0.546947693  |
| GABRE     | 1.9767419    |
| GADD45G   | 1.421624727  |
| GAL3ST3   | -0.612368936 |
| GARS      | 0.811071664  |
| GCA       | 0.406042111  |
| GDF5      | 2.94171532   |
| GDPD1     | -0.553517555 |
| GEM       | 1.05547622   |
| GFPT2     | 0.984027886  |
| GGTA1     | 1.258736556  |
| GHR       | -0.755927371 |
| GIPC3     | 1.303812691  |
| GIPR      | 2.411461295  |
| GLB1L2    | -0.818851314 |

|           |              |
|-----------|--------------|
| GLT8D2    | 0.662039704  |
| GNB1L     | -0.932957266 |
| GNE       | -0.466509936 |
| GNG3      | 0.889066434  |
| GOLM1     | -0.345434275 |
| GOT1      | 0.379544219  |
| GPR125    | -0.638479698 |
| GPR155    | 0.765478095  |
| GPR157    | -0.535248243 |
| GPR64     | 1.251070851  |
| GPRASP2   | -0.814422987 |
| GPX4      | 0.262042127  |
| GRAMD4    | -0.620258826 |
| GRB14     | -0.409572793 |
| GREM1     | 1.003698355  |
| GRIN3B    | -0.600803849 |
| GRP       | 0.972838946  |
| GRTP1     | 0.733812585  |
| GSTA1     | 0.992718027  |
| GSTA4     | -0.974288409 |
| GSTK1     | 0.481248537  |
| GSTM1     | 0.750869547  |
| GTF3C1    | -0.470964572 |
| GTPBP3    | -0.459004886 |
| GYG1      | 0.587367963  |
| GYPC      | -0.596658569 |
| HADH      | -1.008457234 |
| HAMP      | 1.455015832  |
| HCN1      | 2.653947167  |
| HCN2      | -0.705040269 |
| HCN4      | -0.730079213 |
| HDAC9     | -1.094687215 |
| HEYL      | -0.673805323 |
| HFE2      | -0.853250433 |
| HIGD1B    | 3.225636784  |
| HIST1H2BL | -1.552062578 |
| HIVEP1    | 0.967971043  |
| HMGA2     | 1.011625767  |
| HMGCL     | 0.56531381   |
| HMHA1     | 1.276143536  |
| HMOX1     | 1.478462699  |
| HOGA1     | 2.075613313  |
| HPN       | -1.529127732 |

|         |              |
|---------|--------------|
| HS3ST1  | -1.164888472 |
| HSD11B1 | 1.878532953  |
| HSP90B1 | -0.425673368 |
| HSPA12B | 0.630700329  |
| HSPA4L  | 0.990332195  |
| HSPB6   | 0.591802923  |
| HSPB7   | 0.698820427  |
| HTRA2   | -0.745139095 |
| HYOU1   | -0.802449603 |
| IFIT1LB | 1.577644625  |
| IFITM2  | 1.104877455  |
| IFNGR1  | 0.545767957  |
| IGSF3   | -0.561507962 |
| IGSF7   | 2.327557269  |
| IGTP    | -0.724591969 |
| IKZF4   | 0.754868331  |
| IL17RE  | 1.612338986  |
| IL1B    | 0.865728329  |
| IL1RN   | 1.987584056  |
| IL20RB  | 1.45978269   |
| INADL   | -0.753926388 |
| INHA    | 1.674736182  |
| INIP    | -0.721198696 |
| INPP5A  | 0.507427299  |
| INSIG2  | 0.399374637  |
| IPP     | -0.648685098 |
| IRS2    | 0.563973014  |
| IRX4    | -0.633820896 |
| ISCU    | 0.43039593   |
| ITGA5   | 0.60580547   |
| ITGB3BP | 0.921639439  |
| ITGB5   | -0.618887226 |
| JOSD2   | 0.31521587   |
| JUN     | 1.0660901    |
| KCNE1   | 1.587052593  |
| KCNH2   | -0.661746781 |
| KCNJ12  | -0.982713326 |
| KCNJ8   | 0.694384634  |
| KCNK1   | 1.853556581  |
| KCNQ5   | 0.763013616  |
| KCNT1   | 1.457680313  |
| KCTD3   | -0.481641578 |
| KDM1B   | -0.470581045 |



|              |              |
|--------------|--------------|
| KIF13A       | -0.552166894 |
| KL           | 1.112401035  |
| KLHDC7A      | -1.490086175 |
| KLHL33       | -2.135418487 |
| KLHL34       | -1.252468345 |
| KLRB1B       | 1.587292442  |
| KLRK1        | 1.393841703  |
| KRBA1        | -0.575770696 |
| KY           | -3.115641439 |
| L3HYPDH      | -1.000127548 |
| LAMA4        | 0.837221913  |
| LAMC1        | 0.9058555    |
| LARP1B       | 0.401560816  |
| LARS2        | -0.370039119 |
| LEPREL1      | 1.341343368  |
| LGALS3       | 1.694393926  |
| LHFP         | 0.466321814  |
| LIFR         | -1.127944873 |
| LILRB4       | 1.941916143  |
| LIMK1        | 0.707222054  |
| LIPC         | -2.999150723 |
| LITAF        | 0.875357105  |
| LMBRD1       | 0.510590717  |
| LMCD1        | 2.380982793  |
| LNX1         | -0.505795489 |
| LOC100174910 | -0.355721502 |
| LOC100302465 | -1.663807301 |
| LOC100360087 | 0.971187131  |
| LOC100360260 | -0.396204976 |
| LOC100360940 | 0.472067477  |
| LOC100361671 | 0.439662887  |
| LOC100362344 | -1.394825505 |
| LOC100362658 | -0.864493351 |
| LOC100365915 | -1.220377422 |
| LOC100909441 | 0.565423081  |
| LOC100910454 | -0.537881654 |
| LOC100911267 | -1.133724842 |
| LOC100911951 | -1.761008549 |
| LOC100912262 | 1.050008555  |
| LOC102547099 | 0.499923138  |
| LOC102552284 | -0.508971051 |
| LOC24906     | 3.677258249  |
| LOC299282    | 2.086179259  |

|           |              |
|-----------|--------------|
| LOC303140 | -1.251739422 |
| LOC312273 | 3.015005338  |
| LOC498555 | 0.376104698  |
| LOC499602 | 0.411782693  |
| LOC500300 | 0.922974104  |
| LOC502907 | 1.734527301  |
| LOC606294 | -0.47556224  |
| LOC679811 | -0.601475185 |
| LOC680663 | -2.442097618 |
| LOC680964 | -0.488858977 |
| LOC681090 | 1.463225918  |
| LOC681658 | 0.461200522  |
| LOC681754 | 0.444159459  |
| LOC681994 | 0.903647871  |
| LOC684841 | -1.036583944 |
| LOC685431 | 0.639165738  |
| LOC685707 | -0.606242467 |
| LOC686548 | 0.570831348  |
| LOC687311 | 0.394817244  |
| LOC687532 | -2.276426257 |
| LOC688286 | -0.615376071 |
| LOC688321 | 1.504925074  |
| LOC688553 | -1.802799354 |
| LOC689574 | 0.332649791  |
| LOC691485 | -0.777414988 |
| LOC691909 | 0.389276986  |
| LOXL3     | 0.925177112  |
| LPCAT3    | 0.711770411  |
| LPGAT1    | -0.518123772 |
| LRFN5     | -1.539808474 |
| LRIG1     | -0.571311887 |
| LRP1      | 0.678536016  |
| LRRC2     | 1.375108858  |
| LRRC4B    | 0.527782336  |
| LRRC75B   | -1.003646998 |
| LRRK2     | -0.495203754 |
| LRRN4CL   | 1.869823666  |
| LSMEM1    | -1.547326652 |
| LSP1      | 1.03019328   |
| LST1      | 3.069633506  |
| LTBP4     | 1.124527937  |
| LYC2      | 2.280537245  |
| LYPD3     | -0.853483619 |

|         |              |
|---------|--------------|
| LYVE1   | 2.179341817  |
| LZIC    | -0.649593777 |
| MAFF    | 1.364778663  |
| MAFK    | 0.795594098  |
| MAN1C1  | -0.596956314 |
| MAP1B   | 0.651235198  |
| MAP2    | -1.266044328 |
| MAP2K1  | 0.61232086   |
| MAP2K6  | -1.704622188 |
| MAP3K14 | -0.583427237 |
| MAP3K4  | -0.79087827  |
| MAP3K5  | -0.445192861 |
| MAP3K6  | 1.070325778  |
| MAPRE2  | 0.347412924  |
| MARC1   | 1.794345023  |
| MAST2   | 0.637072568  |
| MAZ     | -0.429242018 |
| MED31   | -0.346342724 |
| MEFV    | -2.744007532 |
| MEIS1   | -0.634884435 |
| MELK    | -0.649518354 |
| MEST    | -0.446584314 |
| MFGE8   | 0.79164097   |
| MFRP    | 1.311820517  |
| MFSD2A  | 1.14109719   |
| MGLL    | -0.861834666 |
| MGME1   | -0.58925687  |
| MGST2   | 0.741155598  |
| MID1IP1 | 0.530136311  |
| MIEN1   | 0.537886732  |
| MIR143  | -0.45169606  |
| MIR21   | 1.358837082  |
| MLH3    | -0.504059148 |
| MLLT11  | 1.130006967  |
| MLLT3   | -0.774692082 |
| MLST8   | -0.428344729 |
| MMP15   | -0.717992791 |
| MMP24   | 1.922505711  |
| MNX1    | 1.449705739  |
| MORN4   | 0.893150518  |
| MPP3    | 0.586807655  |
| MPV17   | -0.487901306 |
| MRAP    | 2.513939307  |

|         |              |
|---------|--------------|
| MRC1    | 2.150768746  |
| MRPS21  | 0.198643962  |
| MSN     | 0.536057634  |
| MTHFD2  | 1.414195586  |
| MTHFSD  | -0.646096038 |
| MTSS1   | -0.858013556 |
| MUTYH   | -0.49781755  |
| MVB12B  | -0.642701587 |
| MXRA8   | 0.597041589  |
| MYC     | 0.879665889  |
| MYH14   | -0.699966899 |
| MYL3    | 0.470125088  |
| MYL4    | 1.811365797  |
| MYL7    | 0.773308708  |
| MYLK3   | -0.519762515 |
| MYOZ2   | 0.573747075  |
| MYZAP   | -0.434485205 |
| NACAD   | 1.096374317  |
| NACC2   | -0.407729274 |
| NAPRT1  | -0.714019367 |
| NARF    | 0.601527121  |
| NAV2    | -0.77066716  |
| NCAPD2  | -0.434057541 |
| NCAPD3  | -0.783756069 |
| NCAPG2  | -0.629647473 |
| NCKAP5  | -0.76168928  |
| NCOR2   | -0.348465598 |
| NCS1    | -0.689620983 |
| NDC80   | -0.62462415  |
| NDRG1   | 2.072667715  |
| NDRG4   | 0.752509549  |
| NEDD4L  | -0.464243568 |
| NEDD9   | -0.377633385 |
| NEIL2   | 1.07387682   |
| NEURL1B | -2.350044821 |
| NEURL2  | -0.451938095 |
| NFATC4  | 0.993249903  |
| NFE2    | 1.419746543  |
| NFIA    | -0.503964918 |
| NFYA    | -0.392505343 |
| NGFR    | -0.97888769  |
| NHLRC3  | 0.782426697  |
| NOP10   | 0.217115807  |

|          |              |
|----------|--------------|
| NPAS2    | 1.205390293  |
| NPPB     | 2.127390354  |
| NPRL3    | -0.367961368 |
| NR0B2    | -0.490728795 |
| NR1H3    | 0.876609851  |
| NR1H4    | 0.941923694  |
| NR2F2    | 0.810911632  |
| NR3C2    | -0.996449646 |
| NR4A1    | 1.76934507   |
| NR4A3    | 1.161468964  |
| NRIP3    | 1.125460113  |
| NTF3     | -1.062221104 |
| NUDT8    | -0.489462315 |
| NUMA1    | -0.428068193 |
| NXNL2    | -1.463884927 |
| OSBP2    | -0.86343939  |
| OSBPL7   | -0.395965936 |
| OTUB2    | -0.645680868 |
| OTUD1    | 2.174607999  |
| OVOL2    | -2.079970055 |
| P4HA1    | 0.877603928  |
| P4HA2    | 1.186353478  |
| PADI1    | -2.330426517 |
| PAFAH1B2 | 0.334119808  |
| PALMD    | 0.685491812  |
| PAM      | 0.901400499  |
| PAMR1    | 1.075131157  |
| PAN2     | -0.469014009 |
| PAQR4    | 1.038102165  |
| PAQR8    | -0.79396953  |
| PARD6B   | 0.855225268  |
| PCP4L1   | -0.868230131 |
| PCYT2    | 0.687615153  |
| PDE4A    | -0.694438335 |
| PDE9A    | 0.947926527  |
| PDIA4    | -0.779477944 |
| PDLIM3   | 1.092857464  |
| PDLIM5   | 0.800038422  |
| PDS5B    | -0.538901092 |
| PDZRN3   | 0.611707324  |
| PEBP1    | 0.471711469  |
| PER1     | 0.650391324  |
| PER2     | 0.646962688  |

|          |              |
|----------|--------------|
| PER3     | -0.923368357 |
| PET100   | 0.434312757  |
| PFKL     | 1.451275814  |
| PFKP     | 1.045848926  |
| PGAM1    | 0.869853128  |
| PGAP2    | -0.36065482  |
| PGM1     | 0.720433186  |
| PGPEP1L  | 2.574491134  |
| PHACTR1  | -1.251774715 |
| PHLDB1   | -0.570384082 |
| PHOSPHO1 | -0.558434413 |
| PIAS3    | -0.590080349 |
| PIK3C2B  | -0.652437687 |
| PIK3IP1  | -1.27453169  |
| PIK3R2   | -0.491235313 |
| PIM3     | 0.672049301  |
| PIP5K1B  | 0.694064555  |
| PIWIL2   | -1.623528164 |
| PKM      | 0.607299276  |
| PKNOX1   | -0.415715172 |
| PKNOX2   | 1.059469551  |
| PLA1A    | 1.023549992  |
| PLA2G4A  | 0.682572703  |
| PLAGL1   | -0.646452224 |
| PLCL2    | -0.682693689 |
| PLD3     | 0.451289489  |
| PLEC     | 0.383618991  |
| PLEKHA6  | -0.823876249 |
| PLEKHA8  | -0.643302092 |
| PLEKHG3  | -0.441395289 |
| PLIN3    | 0.665999384  |
| PLIN3    | 0.73928358   |
| PLOD2    | 0.588172735  |
| PLP1     | -0.94987811  |
| PLP2     | 0.508382406  |
| PLXNA1   | -0.487622749 |
| PLXNA3   | -0.828170461 |
| PM20D2   | -2.015229213 |
| PMS1     | -0.472207976 |
| POGK     | -0.490695424 |
| POLD1    | -0.527817006 |
| POMK     | -0.470264773 |
| POR      | 0.387823303  |

|           |              |
|-----------|--------------|
| PORCN     | 0.646150112  |
| POT1      | -0.344436386 |
| POT1B     | -0.768848079 |
| PPAP2B    | -0.950591646 |
| PPARG     | 1.09150332   |
| PPFIBP2   | -1.463115185 |
| PPIF      | 0.399236846  |
| PIIP5K1   | 0.669179275  |
| PPM1B     | 0.440199094  |
| PPP1R13L  | 1.066493999  |
| PPP1R14C  | -0.585332388 |
| PPP1R15A  | 0.605385662  |
| PPP1R36   | 0.496550232  |
| PRAGMIN   | 0.433076134  |
| PRDM16    | -0.659592432 |
| PREX1     | -0.659758339 |
| PRG4      | 1.724902309  |
| PRKDC     | -0.471796252 |
| PRM1      | 1.025397134  |
| PROS1     | 0.750307399  |
| PRR15     | 2.196709151  |
| PRR15L    | 3.238815978  |
| PSMD8     | 0.510993508  |
| PSPH      | 0.984785411  |
| PSTPIP1   | 1.194739787  |
| PTAFR     | 1.687557545  |
| PTER      | 0.470076184  |
| PTGFR     | -0.942630821 |
| PTGIS     | 1.266555295  |
| PTPLB     | 1.393003195  |
| PTPN20B   | -1.637639915 |
| PTPRF     | -0.577167044 |
| PTPRU     | 3.244276742  |
| PXYLP1    | -0.542168291 |
| PYGB      | -0.718158896 |
| RAB11FIP2 | -1.00247754  |
| RAB3A     | -0.835469688 |
| RABAC1    | 0.555223051  |
| RABEP2    | -0.354051902 |
| RAD51D    | -0.654052365 |
| RAI2      | 1.337038382  |
| RAMP1     | 1.618409618  |
| RAPSN     | -1.756359491 |

|            |              |
|------------|--------------|
| RARB       | -0.643359775 |
| RASL11A    | 1.29608542   |
| RBAK       | -0.516714143 |
| RBFOX3     | -2.337169831 |
| RBPMS2     | 0.442311757  |
| RCAN1      | 0.907297478  |
| RCBTB2     | -0.373770705 |
| RCC1       | -0.670337603 |
| RCOR2      | -0.762651072 |
| RELT       | 1.244169523  |
| REM1       | 1.421954698  |
| REPIN1     | -0.370957507 |
| RERE       | -0.42557246  |
| RERG       | 1.143157125  |
| RETN       | 2.195265811  |
| REXO2      | 0.492718585  |
| RGCC       | 2.16806138   |
| RGD1304982 | -0.5747632   |
| RGD1305587 | -1.352539995 |
| RGD1306926 | -0.515263723 |
| RGD1306941 | 0.533948917  |
| RGD1309651 | -2.0508268   |
| RGD1309821 | 0.528891204  |
| RGD1310717 | 1.592025395  |
| RGD1310852 | -0.539359587 |
| RGD1310951 | -0.537457567 |
| RGD1311756 | -0.553797643 |
| RGD1311946 | 0.578776779  |
| RGD1559971 | -1.004911213 |
| RGD1560108 | -0.404166409 |
| RGD1560242 | 2.608939547  |
| RGD1561137 | 0.36042984   |
| RGD1561444 | 1.295942797  |
| RGD1561795 | 1.404963051  |
| RGD1561916 | 2.857216845  |
| RGD1561998 | -2.110419982 |
| RGD1562977 | 1.250671384  |
| RGD1562987 | 0.176451166  |
| RGD1563528 | -1.853480736 |
| RGD1564036 | -0.705288612 |
| RGD1565170 | -0.979829995 |
| RGD1565222 | -0.492017134 |
| RGD1566084 | -0.790464103 |



|                |              |
|----------------|--------------|
| RGMA           | -0.795017075 |
| RGS1           | 2.212504837  |
| RGS17          | 1.41844221   |
| RGS4           | 1.110049245  |
| RGS6           | -1.158514993 |
| RHOJ           | 1.940501319  |
| RIMBP2         | -0.980602868 |
| RIN2           | -0.67341522  |
| RIPK2          | 0.43288544   |
| RN50_10_0291.1 | 0.507660833  |
| RN50_16_0006.1 | -0.87037051  |
| RN50_3_0430.2  | 0.595581612  |
| RN50_4_2163.2  | 0.454117538  |
| RN50_8_0646.1  | -0.526514557 |
| RNASE4         | 1.068561487  |
| RND1           | 1.894374158  |
| RNF113A1       | 0.509535115  |
| RNF141         | -0.542576359 |
| RNF170         | -0.435295988 |
| RNF186         | 1.450517536  |
| RNF207         | -0.459995498 |
| RNF213         | -0.594030042 |
| RNF43          | -0.89994402  |
| RPA1           | -0.426606735 |
| RPL35A         | 0.47969629   |
| RPS6KA6        | -1.465720589 |
| RSPH3          | -0.637870366 |
| RT1-CE3        | 0.816550909  |
| RT1-S2         | 0.482363739  |
| RTN4RL1        | -0.883046073 |
| RTN4RL2        | 2.537708119  |
| RXRA           | -0.689090354 |
| RXRG           | -1.883730582 |
| S100A6         | 0.841653284  |
| S1PR1          | 1.038148199  |
| SAMD10         | -0.434088496 |
| SAMD11         | -0.938772264 |
| SAMD5          | -1.740852127 |
| SAT1           | 0.869416884  |
| SBF2           | -0.509305497 |
| SCAI           | -0.733928698 |
| SCGB1A1        | 3.226302448  |
| SCLY           | 0.319074373  |

|          |              |
|----------|--------------|
| SCMH1    | -0.640154626 |
| SCN1B    | -0.687675977 |
| SCRIB    | -0.367997002 |
| SCRN2    | -0.717172031 |
| SCX      | -0.715243453 |
| SDC4     | 0.775619536  |
| SDCBP2   | 1.836978343  |
| SDF2L1   | -0.641680651 |
| SEC11C   | -0.439210789 |
| SEC16B   | -0.744679444 |
| SEC24B   | -0.442133211 |
| SECISBP2 | -0.422097325 |
| SEL1L3   | -1.903316327 |
| SEMA4D   | -0.532424704 |
| SEMA6B   | 1.42499259   |
| SEMA6D   | -1.057300404 |
| SEMA7A   | -1.266612357 |
| SERINC2  | 1.789145696  |
| SERPINE1 | 1.027293799  |
| SERPINF1 | 0.656106121  |
| SFMBT1   | -0.646129269 |
| SFPQ     | -0.456164945 |
| SFRP1    | 0.984026933  |
| SGCD     | -0.564411447 |
| SGOL2    | -1.093193644 |
| SGSM2    | -0.436825164 |
| SH2B3    | 0.326095506  |
| SH3BP4   | -0.637532904 |
| SH3BP5   | -0.61613435  |
| SH3GLB2  | -0.756307987 |
| SHCBP1   | -1.028240237 |
| SHMT2    | 0.795813366  |
| SHROOM2  | -1.039590106 |
| SIK1     | 1.213788252  |
| SIK3     | 0.448372954  |
| SIPA1L2  | -0.435402725 |
| SIX5     | -0.42211649  |
| SKP1     | 0.296375234  |
| SLC10A5  | -2.571780775 |
| SLC11A1  | 2.143409748  |
| SLC13A4  | 1.097351601  |
| SLC16A10 | -1.235978549 |
| SLC1A4   | 0.672462628  |

|          |              |
|----------|--------------|
| SLC1A5   | 0.708971724  |
| SLC22A23 | -0.509921878 |
| SLC25A23 | -0.510780974 |
| SLC25A5  | 0.393527061  |
| SLC28A2  | 1.622301841  |
| SLC2A1   | 0.735002552  |
| SLC2A12  | 0.94544656   |
| SLC3A2   | 0.904470401  |
| SLC41A3  | 0.801614335  |
| SLC44A2  | -0.852184149 |
| SLC47A2  | 1.062956024  |
| SLC4A11  | 0.917306227  |
| SLC7A1   | 1.051074298  |
| SLC7A5   | 1.379102366  |
| SLC7A6   | 0.819231413  |
| SLC9A1   | -0.834938248 |
| SLCO4A1  | 1.955362303  |
| SMAD3    | -0.433479875 |
| SMARCA2  | -0.701557961 |
| SMC2     | -0.525744755 |
| SMG5     | -0.45463407  |
| SMIM5    | -1.964314637 |
| SMO      | -0.74449257  |
| SMOC1    | -1.605030103 |
| SMPD4    | -0.447691035 |
| SMTN     | -0.597928306 |
| SMTNL2   | -0.558825056 |
| SMURF1   | -0.39520259  |
| SNTG2    | 1.29230487   |
| SORBS2   | 0.855313432  |
| SOX11    | -1.178790532 |
| SPATA6L  | -1.408581022 |
| SPATC1   | 2.596319571  |
| SPHK1    | 0.842050928  |
| SPP1     | 1.380994621  |
| SPRN     | 1.154145267  |
| SPSB4    | 0.792971991  |
| SPTBN4   | -0.643960165 |
| SRBD1    | -0.38312991  |
| SRGN     | 1.970371148  |
| SRPX     | 1.148180747  |
| ST3GAL2  | 1.135931896  |
| ST6GAL1  | -0.53780789  |

|        |              |
|--------|--------------|
| STAC2  | 1.713395133  |
| STARD5 | 0.84072137   |
| STARD8 | -0.389444519 |
| STAT1  | -0.414610169 |
| STAT5A | -0.561145785 |
| STEAP2 | 0.696835104  |
| STEAP3 | -0.740987908 |
| STK38L | 1.230452514  |
| STK40  | 0.573362082  |
| STMN4  | 3.098943511  |
| STOX2  | -1.246032266 |
| STS    | 0.625313203  |
| STXBP6 | -0.7313536   |
| SUPT3H | -0.668133186 |
| SWSAP1 | -0.520120877 |
| SYCP3  | -0.835644311 |
| SYN2   | 1.113614579  |
| SYNJ2  | -0.923828041 |
| SYNM   | 0.677161281  |
| SYPL2  | 0.729522804  |
| SYT3   | 0.632333694  |
| TACR1  | 3.006693732  |
| TACR2  | -1.884855833 |
| TADA3  | -0.451121056 |
| TAGLN2 | 0.469608815  |
| TBC1D4 | -1.092107237 |
| TBCK   | -0.574323119 |
| TBX2   | 0.939662316  |
| TBX22  | -2.313780972 |
| TCAIM  | -0.423875702 |
| TCEA3  | -0.888621846 |
| TCEAL3 | 1.718219235  |
| TCF20  | -0.484665247 |
| TCF23  | 1.677874142  |
| TEAD2  | -0.782955833 |
| TEC    | -0.812288824 |
| TEF    | -0.568884732 |
| TESC   | 0.576793677  |
| TET1   | -1.618593089 |
| TGFB2  | 1.289423015  |
| TGM1   | 1.384623609  |
| THBD   | 1.125534151  |
| THEM4  | 0.317680145  |

|           |              |
|-----------|--------------|
| TIFA      | 0.436028678  |
| TLE6      | -1.33122825  |
| TLR4      | 0.848768351  |
| TLR7      | 2.702142491  |
| TLR8      | 2.040070599  |
| TMBIM1    | 1.037789957  |
| TMBIM4    | 0.507924894  |
| TMEM120B  | 0.737343232  |
| TMEM163   | -0.866690638 |
| TMEM171   | -1.193491541 |
| TMEM179   | -0.646535366 |
| TMEM196   | -0.595958433 |
| TMEM2     | -0.695035112 |
| TMEM25    | -0.730926939 |
| TMEM44    | -0.999876395 |
| TMEM64    | -0.860347342 |
| TMEM71    | -1.403772105 |
| TMEM98    | -0.710789708 |
| TMPRSS4   | -2.536230071 |
| TMPRSS5   | 1.392040734  |
| TMTC4     | -1.19656771  |
| TNFAIP8L2 | 1.332101002  |
| TNFRSF12A | 1.359913354  |
| TNFRSF1B  | 0.870146536  |
| TNFRSF22  | 1.054094132  |
| TNFRSF26  | 0.955944665  |
| TNRC18    | -0.425821708 |
| TOX       | -1.415277336 |
| TRAF3IP2  | 0.567421243  |
| TRAPPC12  | -0.395902047 |
| TRDN      | -0.375772856 |
| TREM1     | 2.376449703  |
| TRH       | 1.415216097  |
| TRIM10    | 3.510454328  |
| TRIM13    | -0.693555362 |
| TRIM45    | -1.114678635 |
| TRIM66    | 3.358034802  |
| TRIP10    | 0.410245714  |
| TRUB1     | -0.531919592 |
| TSC2      | -0.34668475  |
| TSPAN1    | 2.017850783  |
| TSSK4     | 1.334599684  |
| TTLL9     | 1.456152299  |

|           |              |
|-----------|--------------|
| TTYH3     | -0.573752969 |
| TUBB4B    | 0.690694149  |
| TUBB6     | 0.765870262  |
| TXNDC12   | 0.519908387  |
| TYK2      | -0.462639604 |
| TYROBP    | 2.13474173   |
| UACA      | 1.088897076  |
| UBA52     | 0.325241979  |
| UBXN11    | 0.82237529   |
| UGGT1     | -0.395530154 |
| UGT1A3    | 1.328102231  |
| UHRF1BP1L | 0.555145335  |
| UOX       | -1.883188761 |
| UPF2      | -0.546137423 |
| UQCRQ     | 0.447945516  |
| URI1      | -0.467999146 |
| USP30     | -0.506822431 |
| VANGL1    | -0.68067697  |
| VAV2      | -0.561271486 |
| VEPH1     | -1.597141141 |
| VGLL4     | -0.775767646 |
| VMP1      | 1.271499031  |
| VPS26B    | -0.603591818 |
| VPS39     | -0.430503198 |
| VSIG4     | 2.284211619  |
| VWA7      | 1.429660176  |
| WDR11     | -0.5353588   |
| WDR54     | 0.519311754  |
| WDR93     | 1.790414689  |
| WDSUB1    | -0.702625262 |
| WHAMM     | 0.366624388  |
| WNT10B    | 1.185007788  |
| XDH       | 1.619921499  |
| XIRP2     | 1.537572238  |
| YARS      | 0.75310832   |
| YIPF7     | 1.993360045  |
| YPEL2     | -0.713871564 |
| YWHAH     | 0.569478982  |
| ZBTB8A    | -0.533107548 |
| ZDHHC9    | 0.836019047  |
| ZFP1      | -0.486454126 |
| ZFP161    | -0.568237295 |
| ZFP192    | -0.789658137 |

|         |              |
|---------|--------------|
| ZFP212  | -0.431698119 |
| ZFP213  | -0.543945607 |
| ZFP263  | -0.597139666 |
| ZFP266  | -0.65221377  |
| ZFP316  | -0.986160388 |
| ZFP354B | -1.127717412 |
| ZFP385D | -1.096266605 |
| ZFP445  | -0.429929497 |
| ZFP46   | -0.627996193 |
| ZFP512B | -0.594029337 |
| ZFP532  | -0.375245237 |
| ZFP593  | 0.379785094  |
| ZFP786  | -1.097581975 |
| ZFP799  | -0.573286367 |
| ZFP827  | -0.615114638 |
| ZHX3    | -0.480083123 |
| ZMAT1   | -0.853497832 |
| ZMYM3   | -0.471329694 |
| ZNRF2   | 0.574515279  |
| ZSCAN2  | -0.747083206 |
| ZSCAN20 | -0.420730198 |
| ZSCAN29 | -0.429269074 |

**Table S4. Differentially Expressed Transcripts Normalized by PDE5i**

| Gene                                      | Mean SV Fold vs NF | Mean SV+PDE5i Fold vs NF | Mean SV+PDE5i Fold vs NF+PDE5i |
|-------------------------------------------|--------------------|--------------------------|--------------------------------|
| <b>Up in SV &amp; Normalized by PDE5i</b> |                    |                          |                                |
| 5S_RRNA                                   | 3.481630739        | -1.664973829             | 0.937494426                    |
| 6720489N17RIK                             | 1.504925074        | -0.193098424             | -0.143313923                   |
| AABR06011545.1                            | 1.311820517        | -1.788831042             | -1.487619989                   |
| AABR06040258.1                            | 1.518450326        | -0.585386635             | -0.471364391                   |
| AABR06041819.1                            | 3.510454328        | -0.173357516             | 1.286348408                    |
| AABR06044860.1                            | 3.677258249        | 0.202580584              | 1.66507312                     |
| AABR06045205.1                            | 0.508382406        | -0.634767316             | -0.522009426                   |
| AABR06048498.1                            | 0.630700329        | 0.864241807              | 1.372979088                    |
| AABR06053456.1                            | 1.572822315        | -0.702003564             | -0.651231046                   |
| AABR06057556.1                            | 0.376498046        | 0.440567851              | 0.339587489                    |
| AABR06058265.2                            | 0.389276986        | 0.422925051              | 0.412805208                    |
| AABR06060087.2                            | 1.393841703        | -0.317386627             | -0.427594354                   |
| AABR06065806.1                            | 0.555223051        | -0.484098766             | -0.507920175                   |
| AABR06082055.1                            | 2.195265811        | -0.492993796             | -0.152306877                   |
| AABR06082339.1                            | 1.925691948        | -0.242964303             | 0.000477384                    |
| ADAL                                      | 2.596319571        | -0.295726422             | 0.563413079                    |
| ADAM11                                    | 1.553074346        | -0.525541888             | -0.270100073                   |
| ADAMTS8                                   | 0.607299276        | -0.443140881             | -0.061556389                   |
| ADCY5                                     | 0.569478982        | -0.334567491             | -0.277896589                   |
| ADSSL1                                    | 1.185007788        | -0.56956097              | -0.394054793                   |
| AGBL5                                     | 0.637964098        | -0.648695743             | -0.369115729                   |
| ALOX12                                    | 2.653947167        | -0.384601397             | 0.100250131                    |
| ALS2                                      | 0.591802923        | -0.377332867             | -0.224139887                   |
| AMER1                                     | 2.483288826        | -0.737208028             | 0.004974268                    |
| AMIGO1                                    | 0.573747075        | -0.521749906             | -0.341034753                   |
| ANKMY2                                    | 0.708971724        | -0.12016992              | -0.136520233                   |
| ANKRD10                                   | 0.519311754        | -0.539028656             | -0.484334576                   |
| APOH                                      | 1.914514286        | -1.363221061             | -0.754555005                   |
| ARHGAP29                                  | 0.359324982        | -0.632721331             | -0.504150938                   |
| ARHGAP39                                  | 0.372592599        | -0.294912974             | -0.558732781                   |
| ARHGEF10                                  | 0.576471398        | -0.25010116              | -0.224514802                   |
| ARHGEF5                                   | 0.334119808        | -0.694308313             | -0.536522932                   |
| ARRDC3                                    | 1.718219235        | -1.139287837             | -0.615454982                   |
| ATG14                                     | 0.421485963        | -0.233370581             | -0.296387406                   |
| ATP11A                                    | 0.509535115        | -0.485288142             | -0.379530943                   |
| ATXN7                                     | 2.045651522        | -0.712171914             | 0.002740738                    |
| B3GAT1                                    | 1.894374158        | -1.917176286             | -1.810707272                   |
| B4GALNT2                                  | 2.702142491        | -0.254708361             | 0.270996894                    |



|          |             |              |              |
|----------|-------------|--------------|--------------|
| BAHCC1   | 1.334599684 | -0.493149098 | -0.313848359 |
| BC024978 | 1.670807833 | -0.308597238 | -0.045615982 |
| BCHE     | 1.457680313 | -1.085302479 | -0.586577869 |
| BCL7A    | 0.632333694 | -0.306970684 | -0.306202384 |
| BCL9     | 0.482363739 | -0.200834111 | -0.337011979 |
| BHLHE41  | 0.232294946 | -0.887931197 | -0.93647711  |
| BMP5     | 1.591720725 | -0.768093077 | -0.805161723 |
| BOD1     | 0.672462628 | -0.426474371 | -0.335747883 |
| BPIFA1   | 0.332649791 | 2.70083638   | 2.662564889  |
| BRCA2    | 1.456152299 | -0.168186934 | -0.092913472 |
| BRINP2   | 1.708124823 | 0.009671917  | 0.272708708  |
| BTBD8    | 1.251070851 | -0.401144329 | -0.54095378  |
| C1QTNF9  | 2.284211619 | -1.048090679 | -0.217393367 |
| CAD      | 0.84072137  | -0.225019343 | -0.109889561 |
| CAMK1D   | 0.941923694 | -0.814899996 | -0.64038037  |
| CAR6     | 0.858950915 | -0.475606333 | -0.158785384 |
| CCDC57   | 0.302591378 | -0.752610621 | -0.643045285 |
| CCDC69   | 0.876609851 | -0.307088042 | -0.319824696 |
| CCDC88C  | 0.552814626 | -0.529809387 | -0.284629376 |
| CELSR1   | 1.682644147 | -1.003765968 | -0.679443388 |
| CEP135   | 1.112401035 | -0.374719764 | -0.182291304 |
| CEP78    | 1.463225918 | -0.264687215 | -0.316373967 |
| CHM      | 0.737343232 | -0.472927564 | -0.10597625  |
| CKAP2L   | 0.646150112 | -0.925514553 | -0.69956562  |
| CLEC2G   | 1.332101002 | 0.685465496  | 1.109843645  |
| CLN8     | 0.399374637 | 0.664820622  | 0.619185939  |
| CMBL     | 2.072667715 | -0.578290035 | -0.327235909 |
| CNIH4    | 0.351616428 | 0.216013713  | 0.351495313  |
| COG1     | 0.611707324 | -0.180441334 | -0.193039723 |
| COG5     | 1.458901688 | -0.302867768 | -0.098907197 |
| COL20A1  | 1.587547191 | -0.063906444 | -0.060054493 |
| COL8A1   | 0.433076134 | 0.395601574  | 0.617725139  |
| COMMD7   | 0.733812585 | -0.063759205 | -0.135533004 |
| COX6A2   | 0.395516777 | 0.498254473  | 0.428360969  |
| CREB5    | 1.075131157 | 1.219645416  | 2.049346719  |
| CRELD2   | 1.533628321 | -0.660186635 | -0.322672905 |
| CRISPLD2 | 0.984026933 | 1.251610552  | 1.790256947  |
| CTC1     | 0.449278229 | -0.19402148  | -0.26548223  |
| CTCF     | 0.601527121 | -0.388861808 | -0.271856143 |
| CYCS     | 0.345665726 | 0.264106238  | 0.365083108  |
| CYP3A18  | 2.195118245 | -0.948936673 | -0.772192389 |
| CYP4F17  | 1.050008555 | -0.322480676 | -0.251882665 |
| CYP4F6   | 0.862887553 | -0.301032338 | -0.201130578 |

|         |             |              |              |
|---------|-------------|--------------|--------------|
| DCAF4   | 1.461604819 | -0.448181511 | -0.422013149 |
| DCK     | 1.024314418 | -0.168164444 | -0.183844661 |
| DDIT4L2 | 0.800038422 | -1.03773375  | -0.795678242 |
| DDX51   | 0.901234329 | -0.380008148 | -0.240971046 |
| DERL3   | 2.329626079 | -1.321090734 | -0.797793808 |
| DMTN    | 2.574491134 | -0.36177002  | -0.427915468 |
| DNAH11  | 1.64863059  | -0.953757257 | -0.882941052 |
| DTNA    | 0.665999384 | 0.659331942  | 0.796924433  |
| DTWD1   | 1.266555295 | -0.209773082 | -0.210022256 |
| EDA     | 0.586807655 | -1.395005658 | -1.237817923 |
| ELL2    | 0.383618991 | 0.342376125  | 0.478968026  |
| ELOVL2  | 2.847949081 | -0.590853908 | -0.010878769 |
| EPHX2   | 1.521265842 | -0.230512602 | 0.030414321  |
| ERBB2   | 1.011625767 | -0.509681403 | -0.277935484 |
| ESPNL   | 1.863063049 | -1.000977356 | -0.189708336 |
| ETL4    | 1.487656662 | -0.541976911 | -0.303562478 |
| EZH2    | 0.750869547 | -0.263370462 | -0.257853938 |
| FAM174B | 1.592025395 | -1.358103633 | -1.03210068  |
| FAM220A | 1.154145267 | -0.119099414 | -0.088062074 |
| FAM46B  | 1.29608542  | 1.336350284  | 2.132322846  |
| FBP2    | 2.040070599 | -0.64993448  | -0.356758567 |
| FBXL4   | 0.848768351 | -0.059690297 | -0.116352194 |
| FBXO21  | 1.384623609 | -0.153310184 | -0.116955063 |
| FEN1    | 0.533948917 | -0.437112238 | -0.217945862 |
| FGD1    | 1.587292442 | -0.807826138 | -0.524562755 |
| FGF12   | 1.125192064 | -0.498932937 | -0.542556314 |
| FGG     | 3.238815978 | -1.236320535 | -0.035517217 |
| FIGN    | 1.867682641 | -0.608870035 | -0.314944316 |
| FLRT3   | 1.194739787 | -0.172559273 | -0.061666372 |
| FNDC7   | 3.006693732 | -1.212469598 | -0.14380521  |
| FOXP2   | 2.380982793 | -0.61348372  | 0.058675919  |
| FRS3    | 0.750307399 | -0.486774507 | -0.39571231  |
| GAL3ST3 | 0.842137506 | -0.107578123 | -0.333414172 |
| GCA     | 0.499813113 | 0.372778953  | 0.511639881  |
| GDPD1   | 0.971187131 | -0.114153017 | -0.22561115  |
| GNB1L   | 1.205390293 | -0.776152756 | -0.525014342 |
| GOLM1   | 0.864326125 | -0.231139008 | -0.062441166 |
| GPR157  | 0.992718027 | -0.11488164  | -0.201429986 |
| GRAMD4  | 1.025397134 | -0.424959006 | -0.273015447 |
| GRB14   | 0.448372954 | -0.427653078 | -0.333438369 |
| GRTP1   | 0.473586919 | 0.385231303  | 0.832818486  |
| GTPBP3  | 0.854032065 | -0.108840816 | -0.178425866 |
| HADH    | 1.603186509 | -0.46364702  | -0.414137011 |

|              |             |              |              |
|--------------|-------------|--------------|--------------|
| HCN4         | 0.955944665 | -0.354662909 | -0.408904742 |
| HDAC9        | 1.038102165 | -1.426823152 | -0.743310258 |
| HEYL         | 0.510590717 | -0.518059224 | -0.55728504  |
| HFE2         | 1.295942797 | -0.573563407 | -0.433044833 |
| HIST1H2BL    | 2.143409748 | 0.218276769  | -0.656514042 |
| HPN          | 1.980742222 | -0.919580957 | -0.729923052 |
| HS3ST1       | 0.711377588 | -1.332582404 | -0.932093557 |
| HSP90B1      | 0.721526501 | -0.401443609 | -0.192039429 |
| HSPB6        | 0.296375234 | 0.569654592  | 0.550621222  |
| HYOU1        | 1.25980516  | -0.732746981 | -0.387097414 |
| INIP         | 0.546947693 | -0.772063035 | -0.577483248 |
| IPP          | 1.650833181 | -0.256597054 | -0.024431005 |
| IRX4         | 0.569278487 | -0.342629448 | -0.482378262 |
| KCNJ12       | 1.789145696 | -0.368015891 | -0.318260436 |
| KDM1B        | 0.917306227 | -0.285089102 | -0.159583249 |
| KLHL34       | 2.483675391 | -0.897372125 | -0.01138461  |
| KY           | 3.225636784 | -1.735316324 | -1.002462497 |
| LARS2        | 0.726489712 | -0.213081513 | -0.135264729 |
| LOC100174910 | 0.82237529  | -0.046031359 | -0.087681577 |
| LOC100302465 | 3.069633506 | -0.131495566 | 0.254925282  |
| LOC100360260 | 0.641411019 | -0.302866262 | -0.192984542 |
| LOC100362344 | 1.258736556 | -1.082616493 | -0.980074983 |
| LOC100362658 | 0.656106121 | -0.744447721 | -0.656671462 |
| LOC100365915 | 1.853556581 | -0.615169372 | -0.529441643 |
| LOC100911267 | 1.687557545 | -0.405587564 | -0.500614427 |
| LOC100911951 | 2.501153207 | -0.916488799 | -0.496195525 |
| LOC102552284 | 0.43039593  | -0.745669349 | -0.446804172 |
| LOC303140    | 2.327557269 | -0.423765255 | -0.210736435 |
| LOC680663    | 2.179341817 | -1.770233297 | -1.539034084 |
| LOC680964    | 0.573362082 | -0.307334287 | -0.335345198 |
| LOC684841    | 2.296598166 | 0.319918695  | -0.016029378 |
| LOC685707    | 0.451289489 | -0.584504338 | -0.519773291 |
| LOC687532    | 2.504647627 | -1.366535143 | -1.007728821 |
| LOC688286    | 1.037789957 | -0.310095534 | -0.264025448 |
| LOC689574    | 0.57443761  | 0.440497612  | 0.48818174   |
| LOC691485    | 1.062956024 | -0.444999582 | -0.414587985 |
| LOC691909    | 0.323986256 | 0.543267381  | 0.358510837  |
| LPGAT1       | 1.050008555 | -0.408934882 | -0.163956765 |
| LRFN5        | 3.244276742 | -0.197602537 | 0.819805145  |
| LRIG1        | 0.921639439 | -0.460905861 | -0.254280244 |
| LRRK2        | 0.836019047 | -0.39641578  | -0.220265838 |
| LSMEM1       | 1.878532953 | -1.193288006 | -0.802080945 |
| LYPD3        | 1.793519803 | -0.249749953 | -0.176918104 |

|         |             |              |              |
|---------|-------------|--------------|--------------|
| MAP2    | 2.857216845 | -0.846042587 | 0.368073039  |
| MAP3K5  | 0.597041589 | -0.555719909 | -0.269373841 |
| MED31   | 0.387686479 | -0.057234219 | -0.327777663 |
| MEIS1   | 1.110049245 | -0.319970243 | -0.265919982 |
| MELK    | 1.449705739 | -0.06666294  | -0.185932787 |
| MGLL    | 1.29230487  | -0.453111164 | -0.442442151 |
| MGME1   | 1.404963051 | -0.296495709 | -0.142454764 |
| MIR143  | 2.280537245 | 0.091755883  | 0.500008871  |
| MLH3    | 1.244169523 | -0.165220747 | -0.091874844 |
| MLLT3   | 0.555145335 | -0.691782158 | -0.628579075 |
| MLST8   | 0.843256277 | -0.26010796  | -0.148089488 |
| MPV17   | 0.763013616 | -0.146217234 | -0.239842791 |
| MTHFSD  | 1.05547622  | -0.373546109 | -0.290302816 |
| MUTYH   | 1.161468964 | -0.136897783 | -0.103663092 |
| MVB12B  | 0.903647871 | -0.374911315 | -0.33833462  |
| MYH14   | 0.447945516 | -0.731152165 | -0.626473186 |
| MYOZ2   | 0.507660833 | 0.397895851  | 0.684672365  |
| MYZAP   | 0.873162703 | -0.271176649 | -0.137829836 |
| NCAPD2  | 0.678536016 | -0.216341412 | -0.221177613 |
| NCAPG2  | 1.478462699 | -0.275368433 | -0.126972984 |
| NCKAP5  | 0.795594098 | -0.862865933 | -0.502239143 |
| NCS1    | 0.735002552 | -0.431210782 | -0.451060172 |
| NEDD4L  | 0.833148335 | -0.283178275 | -0.192161641 |
| NEDD9   | 0.401560816 | -0.392818486 | -0.335014781 |
| NEURL1B | 3.226302448 | -0.408868519 | -0.19136973  |
| NEURL2  | 1.124527937 | -0.394539429 | -0.072869532 |
| NFIA    | 0.77634182  | -0.475047901 | -0.255463393 |
| NGFR    | 0.319074373 | -0.804298565 | -1.009738678 |
| NPRL3   | 0.4968621   | -0.017000402 | -0.264946334 |
| NR0B2   | 1.358837082 | -0.129619984 | -0.048778609 |
| NUDT8   | 0.782426697 | -0.192550131 | -0.239623354 |
| OVOL2   | 3.015005338 | -1.737645723 | -0.183308547 |
| PADI1   | 2.411461295 | -2.686074842 | -1.097369346 |
| PAN2    | 0.587999645 | -0.389294854 | -0.298516064 |
| PAQR8   | 0.436028678 | -0.83974385  | -0.728083885 |
| PDIA4   | 1.050008555 | -0.659156113 | -0.4264617   |
| PGAP2   | 0.802932248 | -0.033733021 | -0.096895353 |
| PHACTR1 | 1.868350556 | -1.050139437 | -0.550647179 |
| PIAS3   | 0.865728329 | -0.230207001 | -0.304504455 |
| PIK3C2B | 0.694064555 | -0.463144659 | -0.422747039 |
| PIK3R2  | 0.406042111 | -0.302996578 | -0.440409071 |
| PIWIL2  | 2.537708119 | -0.594324581 | -0.296163737 |
| PKNOX1  | 1.07387682  | -0.226931413 | -0.048437646 |

|                |             |              |              |
|----------------|-------------|--------------|--------------|
| PLAGL1         | 0.411782693 | -0.605806283 | -0.586792903 |
| PLCL2          | 1.619921499 | -0.304264833 | -0.081834248 |
| PLEKHA8        | 1.059469551 | -0.420524234 | -0.285765198 |
| PLXNA3         | 0.31521587  | -0.923756674 | -0.861458899 |
| PM20D2         | 2.306721179 | -1.825617468 | -0.991060556 |
| POLD1          | 0.36042984  | -0.304596952 | -0.52723825  |
| POMK           | 0.907297478 | -0.119983951 | -0.160853566 |
| POT1           | 1.276143536 | 0.086005231  | 0.074592496  |
| POT1B          | 1.794345023 | -0.217208117 | -0.08892054  |
| PPAP2B         | 1.523953867 | -0.618700588 | -0.408586288 |
| PPFIBP2        | 0.685491812 | -1.315797801 | -1.244026762 |
| PREX1          | 0.870146536 | -0.464687718 | -0.365397942 |
| PTER           | 0.442311757 | 0.321475699  | 0.537594301  |
| PTPN20B        | 2.94171532  | -1.313082288 | 0.038386336  |
| PXYLP1         | 0.499923138 | -0.352277215 | -0.433462452 |
| RAB11FIP2      | 2.127390354 | -0.433404898 | -0.122797454 |
| RAD51D         | 1.213788252 | -0.216227473 | -0.245051943 |
| RARB           | 1.012707794 | -0.423717259 | -0.301253515 |
| RBAK           | 0.540556946 | -0.443785932 | -0.376492103 |
| RCC1           | 1.130006967 | -0.469695548 | -0.288044272 |
| RERE           | 0.454117538 | -0.307021967 | -0.337946865 |
| RGD1304982     | 0.820903518 | -0.429621186 | -0.308870541 |
| RGD1305587     | 2.608939547 | -0.751975387 | 0.122447658  |
| RGD1306926     | 0.379785094 | -0.393728737 | -0.498607565 |
| RGD1309651     | 0.63220649  | -1.382823375 | -1.860659235 |
| RGD1310852     | 0.960743094 | -0.290012698 | -0.215465603 |
| RGD1311756     | 1.104877455 | -0.379713543 | -0.185186499 |
| RGD1560242     | 0.262042127 | 1.625062695  | 2.567256737  |
| RGD1561795     | 0.527782336 | 2.128543805  | 1.527312748  |
| RGD1561998     | 2.513939307 | -2.138110963 | -0.832733601 |
| RGD1563528     | 0.976447623 | -1.853480736 | -1.524228882 |
| RGD1564036     | 0.646962688 | -0.148263279 | -0.497917644 |
| RGD1565170     | 0.596368014 | -0.311783165 | -0.804344723 |
| RGD1565222     | 1.734527301 | 0.113682264  | 0.168994698  |
| RGD1566084     | 0.827882852 | -0.259750736 | -0.522398898 |
| RIMBP2         | 0.569204579 | -0.949367785 | -0.829355616 |
| RIN2           | 0.868765479 | -0.559609802 | -0.38610434  |
| RN50_16_0006.1 | 1.987584056 | -0.512533039 | -0.058864211 |
| RN50_8_0646.1  | 0.583371383 | -0.676342791 | -0.358973125 |
| RNF141         | 0.816550909 | -0.457664599 | -0.276685482 |
| RNF170         | 0.891366501 | -0.46735298  | -0.132848429 |
| RNF213         | 0.326095506 | -0.750847864 | -0.623079984 |
| RNF43          | 1.941916143 | -0.243380431 | -0.12008096  |

|          |             |              |              |
|----------|-------------|--------------|--------------|
| RPA1     | 0.588172735 | -0.235776068 | -0.252652504 |
| RPS6KA6  | 2.691508718 | -0.537307582 | 0.04404992   |
| RSPH3    | 1.212135674 | -0.091183108 | -0.229037914 |
| RXRA     | 1.003698355 | -0.517536663 | -0.352111474 |
| RXRG     | 2.196709151 | -1.538034704 | -0.95320121  |
| SAMD10   | 0.492718585 | -0.292068304 | -0.331774213 |
| SAMD11   | 0.972838946 | -0.515826585 | -0.610372528 |
| SCAI     | 1.622301841 | -0.218030558 | -0.123468583 |
| SCN1B    | 0.399834778 | -0.554660459 | -0.648866202 |
| SDF2L1   | 0.61232086  | -0.556433441 | -0.460578769 |
| SEC11C   | 0.644269592 | -0.323176613 | -0.23587982  |
| SEC16B   | 0.528891204 | -0.869906325 | -0.619129166 |
| SECISBP2 | 0.693384254 | -0.228923337 | -0.193318177 |
| SFMBT1   | 1.393841703 | -0.430067126 | -0.200770666 |
| SGCD     | 1.239555012 | -0.562978483 | -0.152875723 |
| SGOL2    | 1.712642835 | -0.671717795 | -0.44509447  |
| SH3BP5   | 0.810911632 | -0.504579315 | -0.351132134 |
| SHCBP1   | 1.178008288 | -0.668994164 | -0.632425179 |
| SHROOM2  | 1.80940481  | -0.701867784 | -0.353894202 |
| SIX5     | 0.469608815 | -0.295527273 | -0.332322867 |
| SKP1     | 0.366624388 | 0.349502289  | 0.30405252   |
| SLC10A5  | 3.406254678 | -0.863190817 | -0.006829054 |
| SLC16A10 | 2.376449703 | -0.459949433 | -0.11113936  |
| SLC22A23 | 1.068561487 | -0.178293968 | -0.14473116  |
| SLC25A23 | 0.625313203 | -0.377142563 | -0.325042955 |
| SMAD3    | 0.567421243 | -0.425948411 | -0.285354497 |
| SMC2     | 0.570831348 | -0.448553323 | -0.372865936 |
| SMG5     | 0.470076184 | -0.512937023 | -0.361406466 |
| SMIM5    | 1.455015832 | -1.545036775 | -1.493065203 |
| SMURF1   | 0.389768665 | -0.482522537 | -0.369512975 |
| SOX11    | 1.869823666 | -0.7190848   | -0.471018249 |
| SPATA6L  | 2.345180871 | -0.529572634 | -0.288598816 |
| SRBD1    | 0.792680895 | -0.276917583 | -0.124788806 |
| STARD8   | 1.218460535 | -0.193589501 | 0.021550986  |
| STOX2    | 2.086179259 | -0.784291163 | -0.378183736 |
| STXBP6   | 0.574515279 | -0.720293293 | -0.571800572 |
| SUPT3H   | 1.42499259  | -0.257717212 | -0.210043721 |
| SWSAP1   | 0.875357105 | -0.245497806 | -0.221863028 |
| SYCP3    | 1.477806956 | -0.38896395  | -0.345360836 |
| SYNJ2    | 1.341343368 | -0.825909034 | -0.48432336  |
| SYNM     | 0.413693705 | 0.484347896  | 0.738617399  |
| TACR2    | 3.098943511 | -1.556898488 | 0.034325297  |
| TADA3    | 0.543064798 | -0.394486076 | -0.309669646 |

|                                             |              |              |              |
|---------------------------------------------|--------------|--------------|--------------|
| TBCK                                        | 1.419746543  | -0.29765986  | -0.118548612 |
| TBX22                                       | 3.358034802  | -2.134950942 | 0.19446251   |
| TET1                                        | 2.212504837  | -1.296898403 | -0.670908216 |
| TMEM179                                     | 1.41844221   | -0.083226387 | -0.196934825 |
| TMEM196                                     | 0.47969629   | -0.781936735 | -0.495733227 |
| TMEM2                                       | 0.461369487  | -0.609270822 | -0.607195296 |
| TMEM25                                      | 1.681945318  | -0.032093839 | -0.103364109 |
| TMEM64                                      | 0.73928358   | -0.817938385 | -0.619135863 |
| TMEM71                                      | 2.150768746  | -0.437888065 | -0.504885213 |
| TRAPPC12                                    | 1.148180747  | -0.094346795 | -0.005459262 |
| TRDN                                        | 0.410245714  | -0.489527584 | -0.321993978 |
| TRIM13                                      | 1.143157125  | -0.524937407 | -0.305189664 |
| TRIM45                                      | 2.13474173   | -0.587303604 | -0.220397556 |
| TRUB1                                       | 1.686483917  | -0.164993434 | 0.096584243  |
| TYK2                                        | 0.877603928  | -0.237325749 | -0.163617974 |
| UGGT1                                       | 0.790425006  | -0.43015216  | -0.137663382 |
| UOX                                         | 2.729050206  | -2.238837087 | -0.315216274 |
| VANGL1                                      | 1.790414689  | -0.244808248 | -0.015877617 |
| VAV2                                        | 0.755469978  | -0.332320509 | -0.315520282 |
| VEPH1                                       | 0.939662316  | -1.530224086 | -1.278604834 |
| VGLL4                                       | 0.869416884  | -0.651367505 | -0.48517834  |
| VPS39                                       | 0.786388371  | -0.256121964 | -0.172932437 |
| WDR11                                       | 1.134513847  | -0.17584693  | -0.147920093 |
| YPEL2                                       | 1.020674305  | -0.830628143 | -0.368049871 |
| ZBTB8A                                      | 1.380994621  | -0.245258336 | -0.090563736 |
| ZFP1                                        | 0.677161281  | -0.233307932 | -0.275360857 |
| ZFP161                                      | 1.186323031  | -0.223732983 | -0.16321167  |
| ZFP192                                      | 1.870429754  | -0.532647027 | -0.056780045 |
| ZFP212                                      | 0.914576446  | -0.264146621 | -0.121785987 |
| ZFP263                                      | 0.727561998  | -0.583943083 | -0.359515764 |
| ZFP354B                                     | 1.972023405  | -1.018942934 | -0.338952506 |
| ZFP445                                      | 0.545767957  | -0.403285633 | -0.287841191 |
| ZFP46                                       | 0.993249903  | -0.420883323 | -0.291802765 |
| ZFP786                                      | 1.450517536  | -0.580466406 | -0.632675555 |
| ZFP799                                      | 0.984027886  | -0.455216574 | -0.241640879 |
| ZFP827                                      | 0.754868331  | -0.806050345 | -0.37007164  |
| ZHX3                                        | 0.680231927  | -0.410820586 | -0.266415236 |
| ZMAT1                                       | 1.595076825  | -0.294749547 | -0.261573171 |
| ZSCAN20                                     | 1.215329037  | -0.434358826 | -0.011214546 |
| ZSCAN29                                     | 1.392040734  | -0.11485367  | 0.014749071  |
| <b>Down in SV &amp; Normalized by PDE5i</b> |              |              |              |
| AABR06007342.1                              | -1.05613764  | 0.396977285  | -0.002738795 |
| AABR06010214.2                              | -2.313780972 | 0.477064924  | -0.97703153  |

|                |              |              |              |
|----------------|--------------|--------------|--------------|
| AABR06024251.1 | -0.346342724 | 0.255046048  | 0.355798067  |
| AABR06027280.1 | -1.093193644 | 0            | 0            |
| AABR06029472.1 | -0.7313536   | 2.310985084  | 0.938510475  |
| AABR06037778.1 | -0.241177845 | 1.840259837  | 1.999017807  |
| AABR06046241.1 | -0.853250433 | 1.905041618  | 0.951249964  |
| AABR06048982.1 | -1.552062578 | 2.259664815  | 0.329595275  |
| AABR06058815.1 | -1.392308656 | 0            | -0.331118352 |
| AABR06060231.1 | -0.553797643 | 0.357038952  | 0.477588891  |
| AABR06061565.1 | -0.773580795 | 0.849809857  | 0.529597474  |
| AABR06064750.1 | -1.367015495 | 0.554849073  | 0.223730721  |
| AABR06078259.1 | -1.941822365 | 0.77853975   | 0.252906871  |
| AABR06083207.1 | -1.821896529 | 0.354593027  | -0.151589487 |
| AABR06086840.1 | -0.478750433 | 0.428191415  | 0.305833703  |
| AABR06098247.1 | -0.345434275 | 0.473334494  | 0.365220205  |
| AABR06098740.1 | -0.366413575 | 0.356274218  | 0.233074026  |
| AABR06100487.2 | -0.509921878 | 0.479325269  | 0.329982342  |
| AABR06100965.1 | -0.699966899 | 0.615246598  | 0.311037339  |
| AABR06107093.1 | -0.375772856 | 0.593148712  | 0.136428067  |
| ABCB9          | -0.451938095 | 0.739929903  | 0.939086116  |
| ABI3BP         | -0.462639604 | 0.702302704  | 0.546982365  |
| ACKR2          | -2.571780775 | 0.539171075  | -0.869387218 |
| ACSL4          | -0.494631255 | 0.509591014  | 0.61813797   |
| ADAM15         | -0.564411447 | 0.954613918  | 0.453785005  |
| ADCY4          | -0.924000416 | 0.261982317  | -0.165903597 |
| AGK            | -0.396204976 | 0.369825295  | 0.369048168  |
| AK4            | -1.822787198 | -0.057075901 | -0.20858424  |
| ALG3           | -0.399081953 | 0.512086023  | 0.221951849  |
| ANGPTL2        | -0.844295955 | 0.468853575  | 0.109370204  |
| ANXA2          | -0.450757353 | 0.395844287  | 0.24335438   |
| APOLD1         | -0.527817006 | 0.555009169  | 0.520009794  |
| ARAP3          | -0.979829995 | 0.312028145  | 0.307361887  |
| ARHGAP27       | -0.89994402  | 0.005367929  | 0.035187129  |
| ARL16          | -0.433479875 | 0.401288957  | 0.25406162   |
| ARL3           | -0.415715172 | 0.399932417  | 0.215968202  |
| ARL4A          | -0.429929497 | 0.517475336  | 0.538019614  |
| ASIC1          | -0.568237295 | 1.547295887  | 1.095067667  |
| ATP8A1         | -0.695035112 | 0.676424049  | 0.534816223  |
| AXIN2          | -0.38312991  | -0.702911991 | -0.795000758 |
| B3GNT2         | -0.542168291 | 0.381998422  | 0.175356091  |
| B4GALT1        | -0.34194113  | 0.334291537  | 0.520187203  |
| BDH1           | -0.617581977 | 0.686011463  | 0.56644369   |
| BEAN1          | -1.028240237 | 1.359631675  | 0.862888439  |
| BHLHE40        | -0.518123772 | 0.216202335  | 0.293278371  |



|           |              |              |              |
|-----------|--------------|--------------|--------------|
| BMP6      | -0.486454126 | 0.709060722  | 0.458657155  |
| BNIP3     | -0.620258826 | 0.498586063  | 0.399443156  |
| BOK       | -0.705288612 | 0.436934692  | 0.281824779  |
| CAP1      | -0.502723117 | 0.096701926  | 0.078515031  |
| CAR4      | -0.779477944 | 2.341029808  | 2.153103714  |
| CAR5B     | -0.818450795 | 0.722853413  | 0.524271264  |
| CATSPERG1 | -1.408581022 | 1.103201011  | 0.134986777  |
| CCL20     | -0.445192861 | 1.265086659  | 1.379048577  |
| CCL27     | -0.715243453 | 0.383769591  | 0.210152956  |
| CCL3      | -1.220377422 | 1.974909363  | 0.600310131  |
| CCL6      | -1.233632942 | 1.12787281   | 0.648207378  |
| CD14      | -0.604316756 | 1.153764326  | 0.581726141  |
| CD163     | -0.689090354 | 1.834443563  | 1.910869096  |
| CD48      | -0.573286367 | 0.384799269  | 0.239920729  |
| CD55      | -0.435295988 | 0.600652874  | 0.552750964  |
| CD68      | -1.406385571 | 0.977018362  | 0.113987533  |
| CEP19     | -0.492017134 | 0.536104356  | 0.292906267  |
| CERK      | -0.61613435  | 0.2261762    | 0.1450644    |
| CERS5     | -0.344436386 | 0.558530474  | 0.346128069  |
| CH25H     | -0.814978224 | 1.540651746  | 0.950549372  |
| CHAC1     | -0.79396953  | 0.8177193    | 0.971464382  |
| CISH      | -0.45169606  | 1.000156254  | 0.743310504  |
| CLEC10A   | -1.114678635 | 1.937629812  | 1.434871162  |
| CLEC4E    | -2.442097618 | 0.877209549  | -0.485025544 |
| COL16A1   | -0.652437687 | 0.448069016  | 0.302569396  |
| COX4I2    | -1.511927729 | 1.193868286  | 0.776798981  |
| CP        | -0.790464103 | 1.260361583  | 0.750016443  |
| CPA5      | -2.330426517 | -0.779806251 | -1.117198782 |
| CSF2RB    | -0.860347342 | 1.470252411  | 0.74826856   |
| CTSS      | -1.394825505 | 1.945472211  | 1.082856057  |
| CYBA      | -0.733928698 | 0.566271807  | 0.05900701   |
| CYP51     | -0.689620983 | 0.561395509  | 0.547770799  |
| DAAM2     | -0.643302092 | 0.88960828   | 0.704363265  |
| DCLK1     | -0.489462315 | 0.839774796  | 0.578463206  |
| DIAPH1    | -0.396770857 | 0.334834454  | 0.370870286  |
| DLK1      | -0.698391243 | 3.099667748  | 2.802779649  |
| DPEP1     | -0.508365619 | 1.580494629  | 1.616568692  |
| DSE       | -0.539359587 | 0.433792743  | 0.281528156  |
| EBF1      | -0.61884185  | 0.482629659  | 0.503765938  |
| EBP       | -0.5747632   | 0.580916525  | 0.384770482  |
| EDAR      | -1.036583944 | 1.443114113  | 0.776746871  |
| EFCAB3    | -0.932957266 | 0.525580862  | 0.525580862  |
| EGLN3     | -1.246032266 | 0.278995047  | 0.434924814  |

|           |              |              |              |
|-----------|--------------|--------------|--------------|
| ELOF1     | -0.350174952 | 0.444924292  | 0.286814186  |
| EMP3      | -0.45463407  | 0.445869847  | 0.336214428  |
| ENKUR     | -1.912229994 | -0.162144958 | -0.544071604 |
| ENPP3     | -0.884677397 | 1.742673555  | 1.075523766  |
| EPPIN     | -0.777414988 | 0.70551613   | 0.035095537  |
| ERO1L     | -0.552157662 | 0.227500029  | 0.490066613  |
| ERRF1     | -0.498557339 | 1.592081155  | 1.578723247  |
| F13A1     | -0.744679444 | 2.513511393  | 2.828493722  |
| FABP5     | -0.615114638 | 0.634511176  | 0.381933023  |
| FAM167B   | -1.539808474 | 1.236230285  | 0.600404147  |
| FAM180A   | -0.982713326 | 1.90243536   | 1.023517722  |
| FAM212B   | -0.355721502 | 0.54651373   | 0.475305106  |
| FAXC      | -0.682693689 | 0.178569552  | 0.20856908   |
| FCGBP     | -0.625871858 | 1.445234886  | 1.087991493  |
| FCGR2A    | -1.883188761 | 1.676835377  | 0.395096546  |
| FERMT3    | -1.187169215 | 0.892084144  | 0.369311468  |
| FGR       | -0.508971051 | 0.4772625    | 0.489352663  |
| FOSB      | -1.072294105 | 1.269237558  | 1.43969183   |
| FRRS1     | -0.649518354 | 0.609467104  | 0.261326212  |
| FRZB      | -1.178790532 | 0.562172856  | 0.087514788  |
| FXSD2     | -2.015229213 | 0.81733615   | -0.273734216 |
| GABARAPL1 | -0.429269074 | 0.489754256  | 0.369785732  |
| GDF5      | -1.843116568 | 1.413695666  | 1.120063618  |
| GEM       | -0.545457139 | 0.63767559   | 0.678720317  |
| GFPT2     | -0.655669082 | 0.816477851  | 0.441885969  |
| GGTA1     | -0.646452224 | 0.68099441   | 0.740156155  |
| GIPR      | -1.307257297 | 0.860293678  | 1.044440658  |
| GPR64     | -0.629647473 | 1.074790519  | 0.778223966  |
| GPX4      | -0.386789816 | 0.322036611  | 0.163474125  |
| GREM1     | -0.76168928  | 0.208611163  | 0.338389393  |
| GRP       | -0.768848079 | 0.650181521  | 0.294183575  |
| GSTA1     | -0.553517555 | 1.037938402  | 0.606773822  |
| GSTM1     | -0.469014009 | 0.642468441  | 0.491587818  |
| HAMP      | -0.594030042 | 1.167284945  | 1.038596288  |
| HCN1      | -1.646180342 | 2.166740111  | 0.893316962  |
| HIGD1B    | -1.663807301 | 2.296431093  | 1.457177809  |
| HMGA2     | -0.835644311 | 0.875564617  | 0.263055044  |
| HMHA1     | -1.251774715 | 0.709220548  | -0.013448904 |
| HMOX1     | -1.039590106 | 0.897203257  | 0.461369231  |
| HSD11B1   | -0.490728795 | 1.691374189  | 1.602831992  |
| HSPA12B   | -0.58925687  | 0.473309124  | 0.219799295  |
| IFITM2    | -0.68067697  | 0.890287217  | 0.538473401  |
| IFNGR1    | -0.504059148 | 0.386078257  | 0.236665278  |

|              |              |              |              |
|--------------|--------------|--------------|--------------|
| IGSF7        | -0.923828041 | 1.889406856  | 1.479823442  |
| IGTP         | -0.395530154 | -0.783376654 | -0.837276456 |
| IKZF4        | -0.533107548 | 0.584897483  | 0.39630154   |
| IL1B         | -0.469312449 | 0.679622081  | 0.60435783   |
| IL1RN        | -0.730926939 | 1.273002921  | 1.339662976  |
| INSIG2       | -0.422097325 | 0.208367285  | 0.248019131  |
| ISCU         | -0.367961368 | 0.40952113   | 0.354465346  |
| ITGB3BP      | -0.659758339 | 0.700775961  | 0.375121668  |
| JOSD2        | -0.371621574 | 0.39238487   | 0.235824218  |
| KCNK1        | -0.950591646 | 1.312309416  | 0.978200706  |
| KCNQ5        | -0.646096038 | 0.642095389  | 0.245723343  |
| KCNT1        | -1.202504971 | 0.993899371  | 0.286974491  |
| KL           | -0.434057541 | 0.97692001   | 0.916945618  |
| KLRB1B       | -1.235978549 | 1.351413005  | 0.365917978  |
| KLRK1        | -2.079970055 | 0            | -0.911523418 |
| LARP1B       | -0.388716222 | 0.229185192  | 0.301159887  |
| LEPREL1      | -0.670337603 | 0.728727128  | 0.787975177  |
| LILRB4       | -1.253235627 | 1.437240972  | 0.598865919  |
| LITAF        | -0.654542605 | 0.594228941  | 0.337704771  |
| LMBRD1       | -0.603020492 | 0.321690232  | 0.081789119  |
| LMCD1        | -1.252468345 | 1.048363521  | 1.053095416  |
| LOC100360087 | -0.672785971 | 0.99333449   | 0.41600617   |
| LOC100912262 | -1.076894887 | 0            | 0            |
| LOC102547099 | -0.434088496 | 0.277843183  | 0.300744189  |
| LOC24906     | -1.853480736 | 3.249735054  | 1.811455856  |
| LOC299282    | -0.861834666 | 1.913197354  | 1.309028512  |
| LOC312273    | -1.133724842 | 1.899190142  | 1.899190142  |
| LOC499602    | -0.358460863 | 0.206027245  | 0.343911846  |
| LOC502907    | -1.609417878 | 0.680205952  | 0.067447224  |
| LOC681090    | -0.853483619 | 1.138707061  | 0.701279914  |
| LOC681994    | -1.623528164 | 0.619388891  | -0.80184482  |
| LOC686548    | -0.491235313 | 0.49438638   | 0.289570371  |
| LOC688321    | -1.008457234 | 0.525580862  | 0.525580862  |
| LRP1         | -0.643359775 | 0.499042393  | 0.168540494  |
| LRR4B        | -0.439933583 | 0.118431876  | 0.319473616  |
| LRRN4CL      | -1.094687215 | 1.329795512  | 0.819382518  |
| LST1         | -1.964314637 | 2.798870762  | 0.890023754  |
| LTBP4        | -0.693555362 | 0.913410961  | 0.531189314  |
| LYC2         | -1.63444874  | 1.56581747   | 0.538565566  |
| LYVE1        | -0.634564267 | 1.522690915  | 1.698639687  |
| MAFK         | -0.642701587 | 0.288817355  | 0.287830701  |
| MAP2K1       | -0.612368936 | 0.252065388  | 0.171651517  |
| MARC1        | -0.953656804 | 1.203815462  | 0.910183414  |

|          |              |             |              |
|----------|--------------|-------------|--------------|
| MFRP     | -1.189706605 | 1.151903376 | 0.149644171  |
| MIR21    | -0.980602868 | 0.215869353 | 0.408243052  |
| MLLT11   | -0.67341522  | 0.530127594 | 0.571322044  |
| MNX1     | -1.463115185 | 0           | 0            |
| MPP3     | -0.395902047 | 0.906437    | 0.468805282  |
| MRAP     | -0.864493351 | 2.08422759  | 1.734289877  |
| MRC1     | -1.097581975 | 1.63595013  | 1.081566019  |
| MXRA8    | -0.615376071 | 0.380860794 | 0.147304423  |
| NARF     | -0.687675977 | 0.20941611  | 0.031187784  |
| NDRG1    | -1.618593089 | 0.805803106 | 0.397793994  |
| NEIL2    | -0.646535366 | 0.233039118 | 0.551425325  |
| NFATC4   | -0.873848025 | 0.696684478 | 0.20136495   |
| NFE2     | -0.906547413 | 1.023840575 | 0.601266242  |
| NHLRC3   | -0.574323119 | 0.407635664 | 0.378593621  |
| NPAS2    | -0.721198696 | 0.751817208 | 0.580751652  |
| NPPB     | -0.802449603 | 1.533915867 | 1.398313717  |
| NR1H3    | -0.409572793 | 0.663785523 | 0.742651565  |
| NR1H4    | -0.865151283 | 0.700534185 | 0.157541171  |
| NR2F2    | -0.90309107  | 0.290473549 | -0.001912799 |
| NR4A3    | -0.892122441 | 0.41334534  | 0.366243597  |
| P4HA1    | -0.853497832 | 0.295395867 | 0.115169406  |
| PAFAH1B2 | -0.425673368 | 0.208649608 | 0.166834847  |
| PALMD    | -0.646129269 | 0.140145905 | 0.168146035  |
| PAMR1    | -1.127717412 | 0.54107995  | -0.035376231 |
| PAQR4    | -0.606242467 | 1.073169454 | 0.603288221  |
| PDLIM5   | -0.370039119 | 0.381545505 | 0.722249417  |
| PDZRN3   | -0.542576359 | 0.127410905 | 0.241115172  |
| PER2     | -0.36065482  | 0.383725259 | 0.578556555  |
| PGPEP1L  | -2.350044821 | 0.66746748  | -0.080813849 |
| PIP5K1B  | -0.572715807 | 0.39996181  | 0.296985689  |
| PKM      | -0.495203754 | 0.515772197 | 0.323254047  |
| PKNOX2   | -0.520120877 | 0.971877644 | 0.71928482   |
| PLD3     | -0.5353588   | 0.393290718 | 0.091765994  |
| PLEC     | -0.434485205 | 0.124493897 | 0.184231169  |
| PLIN3    | -0.510780974 | 0.327401703 | 0.346587673  |
| PLIN3    | -0.569140911 | 0.444477509 | 0.346587673  |
| PLOD2    | -0.576986489 | 0.313468748 | 0.179409593  |
| PLP2     | -0.492866863 | 0.332512152 | 0.225859736  |
| PORCN    | -0.515263723 | 0.357270893 | 0.317078149  |
| PRAGMIN  | -0.503964918 | 0.07981836  | 0.124064265  |
| PRM1     | -1.637639915 | 0.698987301 | -0.719605011 |
| PROS1    | -0.530320166 | 0.554354688 | 0.397314555  |
| PRR15    | -1.675609153 | 1.246843604 | 0.425449421  |

|                |              |              |              |
|----------------|--------------|--------------|--------------|
| PRR15L         | -1.063980079 | 2.81973747   | 2.206978742  |
| PSTPIP1        | -0.724591969 | 0.74236543   | 0.56261516   |
| PTAFR          | -1.529127732 | 1.212073972  | 0.116209916  |
| PTGIS          | -0.74666213  | 0.596897575  | 0.60362404   |
| PTPRU          | -0.428344729 | 2.771038941  | 3.071011086  |
| RABAC1         | -0.437607897 | 0.567099958  | 0.350698877  |
| RASL11A        | -0.938772264 | 0.612457543  | 0.421061701  |
| RBPMS2         | -0.420730198 | 0.313321807  | 0.291137703  |
| RCAN1          | -0.516714143 | 0.323292098  | 0.570802147  |
| RELT           | -0.571311887 | 0.937117913  | 0.84964497   |
| RERG           | -0.774692082 | 0.776250749  | 0.453082374  |
| RETN           | -1.164888472 | 1.70629073   | 1.058153431  |
| REXO2          | -0.39520259  | 0.390529237  | 0.38207639   |
| RGD1306941     | -0.511437877 | 0.191047117  | 0.20728203   |
| RGD1309821     | -0.525744755 | 0.288737306  | 0.186355228  |
| RGD1310717     | -1.883730582 | 0            | -0.315216274 |
| RGD1561137     | -0.430503198 | 0.405165323  | 0.173937171  |
| RGD1561444     | -0.627996193 | 0.711049701  | 0.829741806  |
| RGD1561916     | -2.200948693 | 1.957881371  | 0.41435022   |
| RGS1           | -2.0508268   | 1.780906148  | -0.045728335 |
| RGS17          | -0.79703688  | 0.731684456  | 0.693308143  |
| RGS4           | -1.266044328 | -0.244540356 | -0.239221338 |
| RN50_10_0291.1 | -0.480083123 | 0.197736728  | 0.242125312  |
| RN50_4_2163.2  | -0.633820896 | 0.476560719  | -0.026446027 |
| RNASE4         | -0.470581045 | 1.108283134  | 0.805772755  |
| RND1           | -0.789658137 | 1.168297212  | 1.191214027  |
| RNF113A1       | -0.641680651 | 0.268002091  | 0.002569553  |
| RNF186         | -0.775767646 | 1.074717183  | 0.759500908  |
| RPL35A         | -0.483476409 | 0.648543657  | 0.213628358  |
| RT1-CE3        | -0.857306886 | 0.513780463  | 0.049882939  |
| RT1-S2         | -0.535248243 | 0.383777786  | 0.123670233  |
| RTN4RL2        | -1.403772105 | 1.580844372  | 1.11812744   |
| SAT1           | -0.545208802 | 0.613066889  | 0.497383874  |
| SCGB1A1        | -1.597141141 | 2.79399688   | 1.565596622  |
| SCLY           | -0.621363276 | 0.323894316  | -0.14484069  |
| SCX            | -0.373449274 | -0.629787727 | -0.810340128 |
| SEMA6B         | -1.015443529 | 0.343853787  | 0.437932058  |
| SERINC2        | -0.960728214 | 1.220771157  | 0.884912369  |
| SERPINF1       | -0.464243568 | 0.4747772    | 0.403173373  |
| SFRP1          | -0.654052365 | 0.521383956  | 0.45100709   |
| SH2B3          | -0.42211649  | 0.21301886   | 0.172000352  |
| SIK1           | -0.803495564 | 0.587552705  | 0.483752643  |
| SIK3           | -0.429617676 | 0.271422553  | 0.270096319  |

|           |              |             |              |
|-----------|--------------|-------------|--------------|
| SLC11A1   | -1.251739422 | 1.448667791 | 0.87564179   |
| SLC1A4    | -0.561271486 | 0.275821021 | 0.283053902  |
| SLC1A5    | -0.595958433 | 0.473769601 | 0.290613831  |
| SLC28A2   | -0.347182963 | 1.827334494 | 1.56379169   |
| SLC2A1    | -0.526514557 | 0.471309314 | 0.390626209  |
| SLC47A2   | -0.638518496 | 0.794458648 | 0.55678989   |
| SLC4A11   | -0.87037051  | 0.402478501 | 0.125573953  |
| SNTG2     | -0.991919217 | 1.54177138  | 0.316821195  |
| SPATC1    | -1.585085542 | 2.053502019 | 0.941450548  |
| SPP1      | -0.673805323 | 0.955471731 | 0.820991848  |
| SPRN      | -0.713871564 | 0.626333122 | 0.544167085  |
| SRPX      | -0.606518243 | 0.960753939 | 0.708217309  |
| STARD5    | -0.459004886 | 0.570805444 | 0.599636878  |
| STK40     | -0.487901306 | 0.142065194 | 0.304396052  |
| STMN4     | -2.567315433 | 0.513695223 | -0.406874902 |
| STS       | -0.49781755  | 0.386860909 | 0.339033197  |
| SYT3      | -0.499353888 | 0.385325023 | 0.340880712  |
| TACR1     | -3.115641439 | 0.734945374 | -0.910296847 |
| TAGLN2    | -0.42557246  | 0.440181963 | 0.311720779  |
| TBX2      | -1.00247754  | 0.576768536 | -0.037301907 |
| TCEAL3    | -1.270772383 | 1.882377979 | 0.368823663  |
| TGM1      | -0.439210789 | 1.549766306 | 1.176373835  |
| TIFA      | -0.828170461 | 0.33569514  | -0.306260742 |
| TLR4      | -0.730079213 | 0.804878351 | 0.21377106   |
| TLR7      | -1.465720589 | 1.635275054 | 1.241725831  |
| TLR8      | -1.547326652 | 1.9445964   | 0.401279094  |
| TMBIM1    | -0.531919592 | 0.758110061 | 0.682266271  |
| TMEM120B  | -0.429999298 | 0.690015897 | 0.551558845  |
| TMPRSS5   | -1.119218096 | 1.422115327 | 0.306673032  |
| TNFAIP8L2 | -1.495010964 | 0.48876072  | -0.150642549 |
| TNFRSF1B  | -0.637870366 | 0.644423844 | 0.374231798  |
| TNFRSF26  | -0.590080349 | 0.650838074 | 0.539933504  |
| TRAF3IP2  | -0.634884435 | 0.435807325 | 0.084682363  |
| TREM1     | -1.761008549 | 1.288165014 | 0.603427725  |
| TRIM10    | -2.110419982 | 2.548218925 | 1.145102533  |
| TRIM66    | -0.97888769  | 2.250490145 | 2.450373263  |
| TRIP10    | -0.568035088 | 0.065619848 | 0.018619097  |
| TSSK4     | -0.597139666 | 1.086226427 | 0.915526216  |
| TTL9      | -0.451121056 | 1.7007334   | 1.223980917  |
| TYROBP    | -1.884855833 | 1.477044825 | 0.12328372   |
| UBXN11    | -0.648685098 | 0.435541187 | 0.298139532  |
| UHRF1BP1L | -0.389444519 | 0.377070271 | 0.448205239  |
| UQCRCQ    | -0.373380429 | 0.461015601 | 0.35909834   |

|        |              |             |              |
|--------|--------------|-------------|--------------|
| VSIG4  | -1.352539995 | 1.832340592 | 0.916812531  |
| WDR54  | -0.55985468  | 0.349861389 | 0.130541552  |
| WDR93  | -2.276426257 | 0.327957345 | -0.662531106 |
| WHAMM  | -0.431698119 | 0.235511155 | 0.178396266  |
| WNT10B | -1.177577068 | 0.23519146  | 0.043513277  |
| XDH    | -0.668133186 | 1.465718577 | 1.073262961  |
| YWHAH  | -0.426606735 | 0.400122116 | 0.397271828  |
| ZDHC9  | -0.470264773 | 0.660695858 | 0.574098012  |
| ZFP593 | -0.377633385 | 0.222369539 | 0.283788286  |
| ZNRF2  | -0.488858977 | 0.156115214 | 0.303354419  |

## **Figure Legends**

### **Figure S1. PDE5 is Expressed in Pediatric RV Cardiomyocytes**

(A) Sectioned NF and SV tissue was stained with fluorescently labeled secondary antibodies to primary sarcomeric  $\alpha$  actinin (red), primary PDE5 (green) and nuclei were stained with DAPI (blue). The merged confocal laser microscopy images demonstrate that PDE5 is expressed in cardiomyocytes. All images are at 60X magnification, scale bar = 20 $\mu$ M. (B) Representative FV-1000 colocalization analysis scattergram demonstrating significant overlap of  $\alpha$ -actinin and PDE5 channels.

### **Figure S2. Top Canonical Pathways Activated by SV Serum Treatment *in vitro***

Activation z-scores of the top 6 most significantly activated canonical pathways in NF versus SV serum-treated NRVMs compared to NF+PDE5i vs SV+PDE5i serum-treated NRVMs.; Fisher's exact test,  $-\log_{10}(\text{p-value}) > 2.9$  or  $p < 0.001$  n=3 NF, n=3 NF+PDE5i, n=3 SV, n=3 SV+PDE5i in a total of 3 NRVM preparations.

### **Table S1. Subject Characteristics**

Characteristics for all patients included in this study. M = Male, F = Female, ACEi = angiotensin-converting enzyme inhibitor,  $\beta$ -B =  $\beta$  -Blocker, PDEi = phosphodiesterase inhibitor, PDA = patent ductus arteriosus, PA = pulmonary artery, PLE = protein losing enteropathy, NA = not available. \*Non-PDEi Inotrope includes: dopamine, dobutamine, epinephrine, norepinephrine.

### **Table S2. RT-qPCR Primer Sequences**

Listed are the species specific [rat (r) or human (h)] forward (F) and reverse (R) primer sequences used for each target gene. All primers are presented in 5'-3' orientation.

### **Table S3. Differentially Expressed Transcripts**

List of all differentially expressed transcripts, NF vs SV,  $p < 0.05$ .

### **Table S4. Differentially Expressed Transcripts Normalized by PDE5i**

List of all differentially expressed genes (NF vs SV,  $p < 0.05$ ) that were normalized by PDE5i (NF+PDE5i vs SV+PDE5i,  $p > 0.05$ ).
